# Supplementary material
Source: ML conference proceedings conference paper supplement (https://openreview.net/forum?id=m2oQOyeajI)
Supplement: supplementary_material [file NeurIPS_SENSE_wiML.pdf › NeurIPS_SENSE_wiML.pdf]

---

# SENSE: SENsing Similarity SEeing Structure

---

Anonymous Author(s)

Affiliation

Address

email

## Abstract

Low-dimensional embeddings are central to analyzing and visualizing high-dimensional data. However, widely adopted NE methods assume centralized access to all data an unrealistic constraint in privacy-sensitive, decentralized environments. We propose **SENSE**, a geometry-aware, privacy-preserving framework for global neighbor embedding without raw data exchange. SENSE reconstructs global structure using local distance measurements and structured matrix completion, enabling embeddings that preserve both local and global geometry in Euclidean and hyperbolic spaces. It further integrates contrastive learning by deriving cross-client positive and negative pairs from estimated similarities, effectively generalizing negative sampling under structural constraints. Experiments across diverse real-world datasets show that SENSE achieves embedding quality on par with centralized baselines, while offering strong privacy guarantees. Theoretical analysis provides formal bounds on reconstruction fidelity and privacy, establishing conditions under which structure and confidentiality are jointly preserved.<sup>1</sup>

## 1 Introduction

Neighbor embedding (NE) methods are widely used for dimensionality reduction (DR), enabling interpretable low-dimensional visualizations of high-dimensional data [51]. Techniques like t-SNE [53], UMAP [37], MDS [15], and PHATE [38] are effective for visualization [9], anomaly detection [46], and exploratory analysis [16]. These methods, however, assume centralized access to complete pairwise similarity matrices an assumption often violated in real-world settings. In domains such as healthcare [45], finance [8], and mobile networks [34], data is distributed across clients and subject to strict privacy constraints. In such settings, standard NE methods fail due to the absence of global distance information especially problematic for attraction-repulsion frameworks like t-SNE and UMAP [6, 56] that depend on complete similarity graphs to balance local and global structure. Recent work links NE with contrastive learning [10, 11], further emphasizing the importance of accurate pairwise similarities. In privacy-constrained regimes, however, such structure is either missing or only partially available, making decentralized contrastive NE a challenging problem.

**Related Work.** Several approaches have been proposed to address this gap, but they fall short on scalability, privacy, or deployment realism. SMAP [57] offers strong privacy via encrypted multi-party computation, but its cryptographic overhead renders it impractical for large-scale use. FedNE [33] introduces a federated NE framework but lacks intrinsic privacy guarantees and incurs repeated server-client interactions, making it communication heavy. Methods like dSNE [48] and FdSNE [47] require full shared reference datasets for alignment, an unrealistic assumption in many settings, and diverge from standard FL protocols while also introducing high communication and privacy costs. More recently, MMD-based distribution alignment [43] has been used to generate synthetic shared data, but it assumes multi-sample clients and is fragile in single data sample per client scenarios common to IoT and mobile devices. Moreover, it risks adversarial corruption of synthesized distributions and introduces additional computational burden. To address these limitations, we propose **SENSE**,

---

<sup>1</sup>Code is available at [SENSE](#)

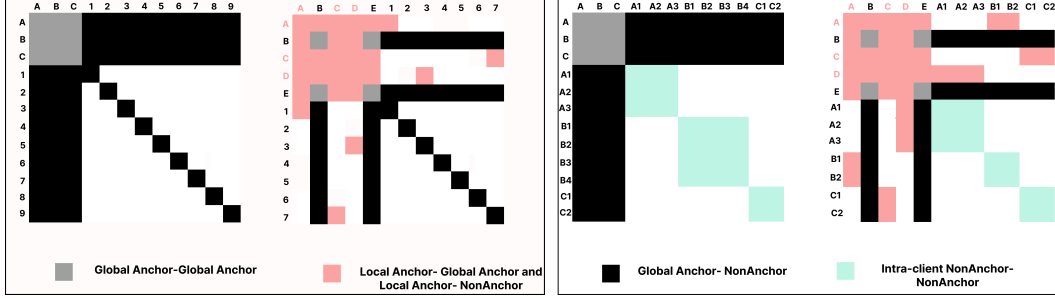

Figure 1: Observed entries in the global distance matrix  $D$  under four SENSE configurations: (1) *Pointwise-Full*, (2) *Pointwise-Partial*, (3) *Multisite-Full*, and (4) *Multisite-Partial*. These differ in the visibility of Anchor–NonAnchor (A–NA) and NA–NA blocks, governed by client-level data locality and anchor access. *Multisite* settings permit intra-client NA–NA observations (e.g., A1, A2, ..., C2), while *Pointwise* settings restrict each client to a single NA (e.g., 1, 2, ..., 9). *Full* modes provide all NAs with access to the global anchor set (e.g., A–E), yielding complete A–NA blocks; *Partial* modes expose disjoint anchor subsets per client, resulting in sparse and structured observations.

a unified, geometry-aware framework for *privacy-preserving decentralized neighbor embedding*. SENSE supports both Euclidean and hyperbolic geometries the latter being critical for embedding hierarchical structures in social and biological data [30, 36]. Unlike prior work, SENSE reconstructs global structure from sparse local distance observations using anchor-based measurements, without requiring raw data sharing, iterative communication, or centralized storage. The completed distance matrix is then used with classical NE methods, contrastive NE, and hyperbolic CoSNE [22].

Although anchor sharing is sometimes perceived as a constraint in decentralized settings [43], it serves as a robust, principled, and privacy-preserving coordination mechanism increasingly adopted in practice. When curated by a trusted server, anchors can be synthetic, anonymized, or sourced from public data completely decoupled from private client records. This mitigates leakage risks inherent to client-generated anchors, which are vulnerable to reconstruction or membership inference, especially in small or skewed-client regimes [43]. Server-curated anchors offer stability, auditability, and adversarial robustness, enabling secure global coordination without compromising privacy. This paradigm is already in use across real-world systems in healthcare [7, 27], genomics [35, 44], finance [2], and mobile/NLP applications [23, 32], illustrating that carefully designed anchor-based schemes are both secure and essential for scalable decentralized learning. Motivated by this, we argue that anchors should be treated as core architectural components rather than ad hoc artifacts. SENSE leverages anchor-based coordination in conjunction with tools from distance matrix completion, network localization, and low-rank recovery, providing formal guarantees for reconstructing global geometry from partial observations. When combined with contrastive learning, it further enhances alignment and expressiveness, bridging classical and modern NE paradigms. SENSE introduces the following key innovations:

- *Privacy by design*: Estimates global structure using only local distance measurements, eliminating the need for encryption or differential privacy.
- *Communication-efficient and geometry-aware*: Requires a single server–client interaction, and supports both Euclidean and hyperbolic spaces for modeling flat and hierarchical data.
- *Deployment flexibility*: Operates under two regimes (Figure 1): *SENSE-Pointwise* for single-point clients (e.g., edge/mobile), and *SENSE-Multisite* for multi-sample clients (e.g., hospitals, banks).
- *Provable reliability*: Offers theoretical guarantees on both privacy preservation and embedding fidelity, validated across diverse modalities and geometries.

These properties make *SENSE* suitable for privacy-sensitive, structurally diverse domains. Hospitals can jointly visualize patient data without violating HIPAA/GDPR [50], banks can detect fraud patterns without sharing transactions [3], and mobile/IoT clients with a single sample can still contribute to global embeddings [4, 42]. Genomic labs can embed single-cell transcriptomes into a shared hyperbolic space that preserves cellular hierarchy and privacy [1, 52]. Crucially, *SENSE* also supports evolving data scenarios and dynamic client participation, new clients or data points can be integrated by estimating only their partial distances to a subset of existing entities, avoiding full re-computation and preserving global coherence with minimal overhead. This makes *SENSE* not only privacy-preserving and geometry-aware but also inherently scalable to dynamic and federated ecosystems.

## 2 Background and Problem Formulation.

**Neighbor Embedding (NE).** Methods like t-SNE [53] and UMAP [10] embed high-dimensional data  $\mathbf{X} = \{x_i\}_{i=1}^n \subset \mathbb{R}^{d_h}$  into a low-dimensional space  $\mathbf{Y} = \{y_i\}_{i=1}^n \subset \mathbb{R}^{d_\ell}$  by preserving pairwise structure. These methods are distance-driven. They transform distances into similarities via kernels to preserve relational structure (see Appendix A.1, A.2). Let  $D_{ij}^{d_h} = \|x_i - x_j\|$  and  $D_{ij}^{d_\ell} = \|y_i - y_j\|$  denote distances in the high- and low-dimensional spaces. These are mapped to similarities via kernel functions:  $S_{ij}^{d_h} = f(D_{ij}^{d_h})$ ,  $S_{ij}^{d_\ell} = g(D_{ij}^{d_\ell})$ , where  $f$  and  $g$  are typically Gaussian, Laplacian, or Cauchy kernels. The general NE objective minimizes the divergence between the two similarity matrices:

$$\mathcal{L}(\mathbf{Y}) = \sum_{i,j} \mathcal{D}(S_{ij}^{d_h}, S_{ij}^{d_\ell}), \quad (1)$$

where  $\mathcal{D}$  is a divergence measure such as KL divergence or binary cross-entropy.

**Contrastive Neighbor Embedding.** CNE [11] extends NE into the contrastive learning framework by training an encoder  $f_\theta$  to map  $\mathbf{x}_i$  to  $\mathbf{y}_i = f_\theta(\mathbf{x}_i)$  such that the neighborhood structure from a  $k$ -NN graph is preserved. CNE uses a distance-aware contrastive loss (see Def A.3 in Appendix), framed as a binary similarity matching problem. Let  $S^{d_h} \in \{0, 1\}^{n \times n}$  denote ground-truth neighborhood indicators and  $S^{d_\ell}$  denote kernel-based similarities in the embedding space. The loss is a weighted binary cross-entropy:

$$\mathcal{L}(\mathbf{Y}) = - \sum_{i,j} \left[ S_{ij}^{d_h} \log S_{ij}^{d_\ell} + b(1 - S_{ij}^{d_h}) \log(1 - S_{ij}^{d_\ell}) \right]. \quad (2)$$

**Key Challenges in Decentralized Settings.** (C1) CNE, like NE, relies on a full similarity matrix, which is unavailable in privacy-sensitive, decentralized settings. (C2) Conventional distributed learning captures only intra-client structure, omitting crucial inter-client neighbor information. (C3) Clients lack access to global data, leading to incorrect kNN graphs and biased negative sampling, as true neighbors may reside on other clients.

**CO-SNE (for Hyperbolic Data).** Hierarchical structures in social, biological, and knowledge graphs grow exponentially, making Euclidean embeddings unsuitable due to distortion of tree-like geometry. Hyperbolic space, with constant negative curvature, naturally models such growth and supports hierarchy-aware learning [19, 36, 40] (see Appendix A.3.1). Standard methods like t-SNE assume Euclidean geometry and distort global structure when applied to hyperbolic data, collapsing depth and relative positioning. CO-SNE [22] extends t-SNE to hyperbolic space (see Def A.4). It preserves both local and global structure using distance-aware kernels in hyperbolic geometry:  $S_{ij}^{d_h} = f(d_{\mathbb{B}^n}(x_i, x_j))$ ,  $S_{ij}^{d_\ell} = g(d_{\mathbb{B}^2}(y_i, y_j))$ , where  $f$  is a hyperbolic normal kernel and  $g$  is a heavy-tailed hyperbolic Cauchy kernel. A regularization term also aligns global depth via norm matching. The full objective is:

$$\mathcal{L}(\mathbf{Y}) = \lambda_1 \cdot \mathcal{D}(S^{d_h}, S^{d_\ell}) + \lambda_2 \sum_i (\rho(x_i) - \rho(y_i))^2, \quad (3)$$

where  $\rho(x) = \|x\|$  and  $\mathcal{D}$  is typically KL divergence.

### 2.1 Problem Formulation

We consider a decentralized system with  $M$  clients  $\{\mathcal{C}_1, \dots, \mathcal{C}_M\}$  coordinated by a central server owned by a private company, hospital, bank, or government agency. Each client  $\mathcal{C}_m$  holds a private dataset  $\mathcal{D}_m = \{\mathbf{x}_i^m\}_{i=1}^{N_m} \subset \mathbb{R}^{d_h}$ , which remains local and disjoint, i.e.,  $\mathcal{D}_m \cap \mathcal{D}_{m'} = \emptyset$  for  $m \neq m'$ . Let  $N = \sum_{m=1}^M N_m$  be the total number of data points, indexed globally by  $i \in [N]$ . We consider two real-world configurations: A) *SENSE-Pointwise*, where each client holds a single sample  $\mathbf{x}^m \in \mathbb{R}^{d_h}$ , and B) *SENSE-Multisite*, where each client holds a local dataset  $\mathbf{X}^m = [\mathbf{x}_1^m, \dots, \mathbf{x}_{N_m}^m] \in \mathbb{R}^{N_m \times d_h}$ . Let  $\mathbf{D} \in \mathbb{R}^{N \times N}$  denote the full squared distance matrix. In Euclidean space,  $\mathbf{D}_{ij} = \|\mathbf{x}_i - \mathbf{x}_j\|^2$ ; in hyperbolic space, it reflects squared distances in the Poincaré ball  $\mathbb{B}^{d_h}$  or Lorentz model  $\mathbb{H}^{d_h}$  (see Appendix A.3). Due to privacy constraints, only a subset of entries is observable. Let  $\Omega \subseteq [N] \times [N]$  be the set of observed indices, and define the projection operator  $\mathcal{P}_\Omega : \mathbb{R}^{N \times N} \rightarrow \mathbb{R}^{N \times N}$  as:

$$[\mathcal{P}_\Omega(\mathbf{D})]_{ij} = \begin{cases} \mathbf{D}_{ij}, & \text{if } (i, j) \in \Omega, \\ 0, & \text{otherwise.} \end{cases} \quad (4)$$

122 **Goal 1** Our goal is to recover the full distance matrix  $\hat{\mathbf{D}} \in \mathbb{R}^{N \times N}$  from partial observations  
 123  $\mathbf{D}_\Omega = \mathcal{P}_\Omega(\mathbf{D})$  via structured matrix completion. Instead of estimating distances directly, we infer  
 124 latent embeddings  $\hat{\mathbf{X}}$  whose induced distances match the observed entries. This is done without  
 125 access to raw features, relying solely on  $\mathbf{D}_\Omega$ . Formally,

$$\hat{\mathbf{D}} = \mathcal{D}(\hat{\mathbf{X}}) = \arg \min_{\mathbf{X}'} \|\mathcal{P}_\Omega(\mathcal{D}(\mathbf{X}')) - \mathbf{D}_\Omega\|_F^2, \quad (5)$$

126 where  $\mathcal{D}(\mathbf{X}')$  is the distance matrix induced by  $\mathbf{X}'$  under the chosen geometry (Euclidean or hyper-  
 127 bolic). From  $\hat{\mathbf{D}}$ , we derive a global low-dimensional embedding  $\mathbf{Y} = \{\mathbf{y}_i\}_{i=1}^N \subset \mathbb{R}^{d_\ell}$  with  $d_\ell \ll d_h$ ,  
 128 preserving neighborhood structure.

129 We use  $\hat{\mathbf{D}}$  to find the similarities, defined in Eq. 6 and optimized via divergence  $\mathcal{D}(S^{d_h}, S^{d_\ell})$  (Eq. 1).

$$S_{ij}^{d_h} = \exp\left(-\frac{\hat{\mathbf{D}}_{ij}}{2\sigma^2}\right), \quad S_{ij}^{d_\ell} = g(\|\mathbf{y}_i - \mathbf{y}_j\|^2), \quad (6)$$

130 For contrastive learning, we build binary similarities using  $k$ -nearest neighbors:

$$S_{ij}^{d_h} = \begin{cases} 1, & \text{if } j \in \text{kNN}(i; \hat{\mathbf{D}}), \\ 0, & \text{otherwise,} \end{cases} \quad S_{ij}^{d_\ell} = \phi(\mathbf{y}_i, \mathbf{y}_j) = \frac{1}{1 + \|\mathbf{y}_i - \mathbf{y}_j\|^2}, \quad (7)$$

131 and minimize the contrastive loss (Eq. 2). For hierarchical data, we apply CO-SNE, treating  $\hat{\mathbf{D}}$  as  
 132 squared hyperbolic distances in the Poincaré model to compute similarities (Eq. 17 in Appendix).  
 133 The embedding  $\mathbf{Y} \subset \mathbb{R}^{d_\ell}$  is optimized using the CO-SNE loss (Eq. 3).

134 **Remark 1** Conventional FL methods (e.g., FedAvg) assume large local datasets, require multiple  
 135 communication rounds, and expose gradients that risk privacy leaks [20, 62]. They also fail in  
 136 pointwise settings where local training is infeasible. In contrast, SENSE reconstructs  $\hat{\mathbf{D}}$  via privacy-  
 137 preserving matrix completion and then optimizes NE, CNE, or CO-SNE objectives without sharing  
 138 raw features.

### 139 3 Proposed Framework: SENSE

140 As described in Section 2.1, we consider two decentralized settings: *SENSE-Pointwise* and *SENSE-*  
 141 *Multisite*. In both, each client holds private non-anchor (NA) data and accesses a shared anchor set  
 142  $\mathcal{A} = \{a_1, \dots, a_K\}$  with feature matrix  $\mathbf{X}_A = [\mathbf{p}_1, \dots, \mathbf{p}_K]^\top \in \mathbb{R}^{K \times d_h}$ . Anchors, broadcast by the  
 143 server, may be global or client-specific (see Appendix A.8). Let  $\mathcal{X} = \{x_1, \dots, x_N\}$  be the set of all  
 144 private NA points, where  $N = \sum_{m=1}^M N_m$ . Each client computes squared distances between its NAs  
 145 and accessible anchors:

$$\mathbf{d}_i^m = [\|x_i^m - \mathbf{p}_1\|^2, \dots, \|x_i^m - \mathbf{p}_K\|^2],$$

146 and transmits these to the server, masking unshared local anchors. In *Pointwise*, each client contributes  
 147 one NA-anchor vector, in *Multisite*, intra-client NA-NA distances may also be known. The global  
 148 incomplete squared distance matrix  $\mathbf{D} \in \mathbb{R}^{(K+N) \times (K+N)}$  is partitioned as:

$$\mathbf{D} = \begin{bmatrix} E & F \\ F^\top & G \end{bmatrix}, \quad (8)$$

149 where  $E$  is anchor-anchor,  $F$  is anchor-NA, and  $G$  is NA-NA. The observed subset is indexed by  
 150  $\Omega \subseteq [K + N]^2$ , based on anchor visibility and client configuration. We consider four configurations:  
 151 *Pointwise-Full*, *Pointwise-Partial*, *Multisite-Full*, and *Multisite-Partial* which differ in the extent  
 152 of observed entries in  $F$  (anchor-NA) and  $G$  (NA-NA). These define distinct visibility patterns in  
 153  $\Omega$ , summarized in Appendix Table 4 and illustrated in Figure 1, and determine which distances are  
 154 available for structured matrix completion.

155 To reconstruct the full matrix  $\hat{\mathbf{D}}$ , or specifically  $\hat{G}$ , we apply geometry-specific solvers: anchored-  
 156 MDS in Euclidean space (discussed in Sec 3.1) and LHydra [30] in hyperbolic space. The complete  
 157 pipeline is outlined in Algorithm 1 in Appendix.

158 **Remark 2** In practice,  $F$  may be only partially visible due to bandwidth, privacy, or data limitations.  
 159 SENSE is designed to operate under such conditions. Whether  $F$  is full or partial, structured matrix  
 160 completion (in SENSE) enables accurate and privacy-preserving recovery of inter-client affinities.

### 161 3.1 SENSE via Anchored-MDS

Classical MDS embeds  $N$  points by minimizing stress over a fully observed distance matrix  $\mathbf{D} \in \mathbb{R}^{N \times N}$ . The embedding  $\mathbf{X} \in \mathbb{R}^{N \times d_h}$  minimizes:

$$\sigma(\mathbf{X}) = \sum_{i < j} (\|x_i - x_j\| - \delta_{ij})^2,$$

162 where  $\delta_{ij}$  is the input Euclidean distance between points  $i$  and  $j$ . SMACOF solves this using  
163 a majorization-based surrogate [13],  $\tau(\mathbf{X}, \mathbf{Z}) = C + \text{tr}(\mathbf{X}^\top \mathbf{V} \mathbf{X}) - 2 \text{tr}(\mathbf{X}^\top \mathbf{B}(\mathbf{Z}) \mathbf{Z})$ , with the  
164 iterative update:

$$\mathbf{X}^{(k)} = \mathbf{V}^\dagger \mathbf{B}(\mathbf{X}^{(k-1)}) \mathbf{X}^{(k-1)}. \quad (9)$$

In SENSE, the full distance matrix  $\mathbf{D}$  is not available, instead we work with a structured, incomplete matrix of observed anchor-NA distances. Let the embedding be  $\mathbf{X} = [\mathbf{X}_A \ \mathbf{X}_{NA}]^\top$ , where  $\mathbf{X}_A$  and  $\mathbf{X}_{NA}$  are anchor and NA embeddings, respectively. The stress is minimized over observed entries only:

$$\sigma(\mathbf{X}) = \|\mathcal{P}_\Omega(\mathcal{D}(\mathbf{X}) - \mathbf{D})\|_F^2,$$

165 where  $\mathcal{P}_\Omega$  projects onto the observed indices  $\Omega$ , and  $\mathcal{D}(\mathbf{X})$  computes pairwise distances. The  
166 SMACOF updates are restricted to  $\Omega$ , with:

$$V_{ij} = \begin{cases} |\{j : (i, j) \in \Omega\}|, & i = j \\ -1, & (i, j) \in \Omega, i \neq j \\ 0, & \text{otherwise} \end{cases}, \quad B_{ij}(\mathbf{X}) = \begin{cases} -\frac{\delta_{ij}}{\|x_i - x_j\|}, & (i, j) \in \Omega, i \neq j \\ -\sum_{k \neq i, (i, k) \in \Omega} B_{ik}, & i = j \\ 0, & \text{otherwise} \end{cases}$$

167 We partition  $V$  and  $B$  as defined in Eq. 10, where  $V_{AA}, B_{AA} \in \mathbb{R}^{K \times K}$ ,  $V_{AN}, B_{AN} \in \mathbb{R}^{K \times N}$ , and  
168  $V_{NN}, B_{NN} \in \mathbb{R}^{N \times N}$ :

$$\mathbf{V} = \begin{bmatrix} \mathbf{V}_{AA} & \mathbf{V}_{AN} \\ \mathbf{V}_{AN}^\top & \mathbf{V}_{NN} \end{bmatrix}, \quad \mathbf{B} = \begin{bmatrix} \mathbf{B}_{AA} & \mathbf{B}_{AN} \\ \mathbf{B}_{AN}^\top & \mathbf{B}_{NN} \end{bmatrix} \quad (10)$$

169 The update rule for NA embeddings becomes:

$$\mathbf{X}_{NA}^{(k)} = \mathbf{V}_{NN}^\dagger \left( \mathbf{B}_{NN} \mathbf{X}_{NA}^{(k-1)} + \mathbf{B}_{AN}^\top \mathcal{P}_\Omega(\mathbf{X}_A) - \mathbf{V}_{AN}^\top \mathcal{P}_\Omega(\mathbf{X}_A) \right). \quad (11)$$

170 This projection-aware update ensures  $\mathbf{X}_{NA}$  uses only observed/available distances, enabling privacy-  
171 preserving global embedding under any SENSE configuration. The projection operator  $\mathcal{P}_\Omega$  acts  
172 as a binary mask over observed entries. While  $\mathbf{V}$  and  $\mathbf{B}$  are derived from  $\Omega$ , we apply  $\mathcal{P}_\Omega$  to  $\mathbf{X}_A$   
173 in Eq. (11) to retain only anchors with observed anchor-NA distances. This avoids leakage from  
174 inaccessible anchors and ensures privacy-compliant updates. Pseudocode is provided in Appendix A.7.  
175 Furthermore, to preserve privacy, the number of shared anchors  $K$  must be limited. Theorems 3.1,  
176 3.2 (Euclidean) and Lemma 1 (hyperbolic) characterize how  $K$  relates to embedding dimension  $d_h$   
177 across SENSE configurations, establishing conditions for faithful reconstruction.

178 **Theorem 3.1** Let  $\mathcal{X} = \{\mathbf{x}_1, \dots, \mathbf{x}_N\} \subset \mathbb{R}^{d_h}$  be the set of NA data points, and let  $\mathcal{A} =$   
179  $\{\mathbf{a}_1, \dots, \mathbf{a}_K\} \subset \mathbb{R}^{d_h}$  be the set of  $K$  anchor points. Suppose we observe the pairwise Euclidean  
180 distances  $\{\|\mathbf{x}_i - \mathbf{a}_j\|\}_{i \in [N], j \in [K]}$  between each NA and all anchors. If the number of anchors satisfies  
181  $K < d_h$ , then the original NA features  $\{\mathbf{x}_i\}_{i=1}^N$  cannot be exactly reconstructed from these distances,  
182 guaranteeing the privacy of the individual client data.

183 *Proof.* Deferred in Appendix, check A.2.

184 SENSE supports multiple configurations, which critically influence embedding fidelity and privacy.  
185 Theorem 3.2 formalizes privacy guarantees when only partial anchor-NA distances (block  $F$ ) are  
186 available, covering both *pointwise* and *multisite* regimes. 1) *SENSE-Pointwise*: Each client  $j \in [N]$   
187 holds a single private point  $\mathbf{x}_j \in \mathbb{R}^{d_h}$  and accesses a subset of anchors indexed by  $\mathcal{I}_j \subseteq [K]$ . The  
188 corresponding anchor set is  $\mathcal{A}_j = \{\mathbf{a}_i\}_{i \in \mathcal{I}_j}$ , comprising: (i) global anchors  $\mathcal{A}_G = \{\mathbf{a}_1, \dots, \mathbf{a}_{M_G}\}$ ,  
189 shared across all clients, and (ii) local anchors  $\mathcal{A}_L^{(j)}$ , unique to client  $j$ . The total number of anchors  
190 observed is  $r_j = |\mathcal{I}_j| = M_G + M_L^{(j)}$ . 2) *SENSE-Multisite*: Each client  $m \in [M]$  holds a local dataset



191  $\mathcal{X}^{(m)} = \{\mathbf{x}_{m,1}, \dots, \mathbf{x}_{m,n_m}\} \subset \mathbb{R}^{d_h}$ , where  $N = \sum_{m=1}^M n_m$ . Each point  $\mathbf{x}_{m,i}$  observes distances  
 192 to (i) a shared global anchor set  $\mathcal{A}_G$ , and (ii) a local anchor set  $\mathcal{A}_L^{(m)}$  exclusive to client  $m$ . Let  
 193  $\mathcal{I}_{m,i} = \mathcal{I}_G \cup \mathcal{I}_L^{(m)}$  be the index set of accessible anchors, with  $r_{m,i} = |\mathcal{I}_{m,i}|$  denoting the number  
 194 observed.

195 **Theorem 3.2** *Let  $\mathcal{X} = \{\mathbf{x}_1, \dots, \mathbf{x}_N\} \subset \mathbb{R}^{d_h}$  be the set of all non-anchor (NA) points across  
 196 all clients, where each  $\mathbf{x}_i$  computes squared distances only to a subset of accessible anchors  
 197  $\mathcal{A}_i = \{\mathbf{a}_j\}_{j \in \mathcal{I}_i}$ , with  $|\mathcal{I}_i| = r_i$ . If  $r_i < d_h$  for all  $i \in [N]$ , then exact recovery of each  $\mathbf{x}_i$  is  
 198 impossible. The inverse map from anchor distances to features is non-unique, preserving privacy  
 199 under both pointwise and multisite configurations.*

200 *Proof.* Deferred in Appendix, check A.1.

201 **Lemma 1** *Let  $\{\mathbf{x}_1, \dots, \mathbf{x}_{K+N}\} \subset \mathbb{H}^{d_h}$  be  $K$  anchors and  $N$  non-anchor points in hyperbolic space  
 202 with curvature  $-\kappa$ . Suppose only blocks  $E$  and  $F$  of the global distance matrix  $\mathbf{D}$  are observed. If  
 203  $K < d_h$ , the NA coordinates cannot be exactly recovered up to isometry in  $\mathbb{H}^{d_h}$ , ensuring the privacy  
 204 of the client data in SENSE. This follows from the contrapositive of the L-HYDRA theorem [30],  
 205 which guarantees exact recovery only when  $K \geq d_h$  and anchors span a full subspace.*

### 206 3.2 SENSE in Evolving Distributed Environments

207 In dynamic settings, new data points arrive continuously e.g., a hospital admitting a patient, a  
 208 bank processing a transaction, or a platform onboarding a user. Recomputing the full embed-  
 209 ding for each arrival is inefficient and may disrupt global structure. Existing decentralized NE  
 210 methods [33, 43, 47, 48] assume static datasets and lack support for incremental updates, mak-  
 211 ing them unsuitable for streaming environments. SENSE, by contrast, is modular and compatible  
 212 with out-of-sample embedding methods [5, 24, 41]. Once the global embedding is constructed  
 213 via anchor-based completion and NE optimization, it defines a geometry-aware coordinate space  
 214 that supports new points without full recomputation. Let  $\mathbf{X}_{NA} = [\mathbf{x}_1, \dots, \mathbf{x}_N] \in \mathbb{R}^{N \times d_h}$  be the  
 215 reconstructed NA embeddings. When a new point  $\mathbf{y}$  arrives, we select  $K$  existing points as pseudo-  
 216 anchors  $\mathcal{A} = \{\mathbf{a}_1, \dots, \mathbf{a}_K\} \subset \mathbf{X}_{NA}$ , with coordinates  $\mathbf{X}_A = [\mathbf{p}_1, \dots, \mathbf{p}_K]^\top \in \mathbb{R}^{K \times d_h}$ . Given  
 217 dissimilarities  $\{\delta_{l_{i,y}}\}_{i=1}^K$  to these anchors, we compute the embedding  $\hat{\mathbf{y}}$  by solving:

$$\hat{\sigma}(\hat{\mathbf{y}}) = \sum_{i=1}^K (\|\mathbf{p}_i - \hat{\mathbf{y}}\|_2 - \delta_{l_{i,y}})^2. \quad (12)$$

218 Here,  $\delta_{l_{i,y}}$  is the dissimilarity in the original space, and  $\|\mathbf{p}_i - \hat{\mathbf{y}}\|_2$  is the distance in the embedding  
 219 space. Only  $\hat{\mathbf{y}}$  is optimized, anchors remain fixed. Since  $K < d_h$ , exact recovery is impossible  
 220 (Theorems 3.1, 3.2), ensuring privacy. This lightweight optimization requires no raw data and  
 221 supports real-time integration, making SENSE well-suited for scalable, privacy-constrained systems.

## 222 4 Experiments

223 In this section, we first outline the experimental setup, followed by an evaluation of SENSE across  
 224 diverse datasets and deployment settings.

### 225 4.1 Experimental Setup

226 **Datasets.** We evaluate SENSE on 14 public datasets widely used in DR and representation learn-  
 227 ing [18, 63]. These include three benchmarks: MNIST [14], Fashion-MNIST [58], and CIFAR-  
 228 10 [21]; seven MedMNIST datasets [60]: DermaMNIST, PneumoniaMNIST, RetinaMNIST, BreastM-  
 229 NIST, BloodMNIST, OrganCMNIST, OrganSMNIST; and the German Credit dataset [25] for financial  
 230 risk modeling. For hyperbolic evaluation, we use three graph datasets: Airport [36], Amazon [59],  
 231 and DBLP [29]. Detailed dataset statistics and system specifications are provided in Appendix Table 5  
 232 and A.12.

233 **Baselines.** We compare SENSE against centralized (Van) baselines: t-SNE [53], UMAP [37],  
 234 PHATE [38], and CNE [11] (with  $s \in \{0, 0.5, 1\}$ ). These assume full raw data access at a central  
 235 server and serve as upper bounds for evaluating SENSE’s privacy-preserving performance.

236 **Implementation Details.** SENSE comprises two stages: matrix completion and global embedding.  
 237 In the first stage, data is partitioned across  $M$  clients. In *Pointwise*, each client holds one NA  
 238 point, sampled randomly. In *Multisite*, clients hold multiple NA points under IID or non-IID splits

Table 1: Full vs. Partial comparison in MULTISITE under non-IID (unbalanced) splits. Evaluation spans centralized and privacy-preserving SENSE variants across different embedding quality metrics.

| Data                          | Metric | t-SNE  |        | UMAP   |        | PHATE  |        | CNE(s=0) |        | CNE(s=0.5) |        | CNE(s=1) |        |
|-------------------------------|--------|--------|--------|--------|--------|--------|--------|----------|--------|------------|--------|----------|--------|
|                               |        | VAN.   | SENSE  | VAN.   | SENSE  | VAN.   | SENSE  | VAN.     | SENSE  | VAN.       | SENSE  | VAN.     | SENSE  |
| — Multisite-Partial Setting — |        |        |        |        |        |        |        |          |        |            |        |          |        |
| MNIST                         | Trust. | 0.9890 | 0.9898 | 0.9553 | 0.9552 | 0.8741 | 0.8763 | 0.9517   | 0.9521 | 0.9524     | 0.9538 | 0.9455   | 0.9476 |
|                               | Cont.  | 0.9575 | 0.9639 | 0.9774 | 0.9771 | 0.9811 | 0.9804 | 0.9806   | 0.9797 | 0.9799     | 0.9787 | 0.9799   | 0.9787 |
|                               | Stead. | 0.7719 | 0.7861 | 0.7639 | 0.7635 | 0.6628 | 0.6746 | 0.7840   | 0.7790 | 0.7752     | 0.7768 | 0.7634   | 0.7658 |
|                               | Cohes. | 0.8189 | 0.8458 | 0.8865 | 0.8853 | 0.8668 | 0.8877 | 0.9229   | 0.9112 | 0.9107     | 0.9196 | 0.9158   | 0.9087 |
| fashionMNIST                  | Trust. | 0.9902 | 0.9914 | 0.9140 | 0.9148 | 0.9579 | 0.9557 | 0.9765   | 0.9752 | 0.9784     | 0.9769 | 0.9765   | 0.9731 |
|                               | Cont.  | 0.9608 | 0.9590 | 0.9812 | 0.9818 | 0.9910 | 0.9906 | 0.9915   | 0.9913 | 0.9905     | 0.9903 | 0.9900   | 0.9901 |
|                               | Stead. | 0.8415 | 0.8643 | 0.7570 | 0.7622 | 0.7836 | 0.7891 | 0.8632   | 0.8638 | 0.8643     | 0.8660 | 0.8493   | 0.8513 |
|                               | Cohes. | 0.6496 | 0.6559 | 0.6748 | 0.7069 | 0.7051 | 0.7115 | 0.7680   | 0.7669 | 0.7637     | 0.7508 | 0.7792   | 0.7666 |
| — Multisite-Full Setting —    |        |        |        |        |        |        |        |          |        |            |        |          |        |
| MNIST                         | Trust. | 0.9890 | 0.9852 | 0.9553 | 0.9570 | 0.8741 | 0.8780 | 0.9517   | 0.9516 | 0.9524     | 0.9542 | 0.9455   | 0.9452 |
|                               | Cont.  | 0.9575 | 0.9518 | 0.9774 | 0.9754 | 0.9811 | 0.9797 | 0.9806   | 0.9772 | 0.9799     | 0.9763 | 0.9799   | 0.9761 |
|                               | Stead. | 0.7719 | 0.7953 | 0.7639 | 0.7726 | 0.6628 | 0.6688 | 0.7840   | 0.7808 | 0.7752     | 0.7828 | 0.7634   | 0.7690 |
|                               | Cohes. | 0.8189 | 0.8328 | 0.8865 | 0.8865 | 0.8668 | 0.8818 | 0.9229   | 0.9047 | 0.9107     | 0.8926 | 0.9158   | 0.9106 |
| fashionMNIST                  | Trust. | 0.9902 | 0.9895 | 0.9140 | 0.9076 | 0.9579 | 0.9555 | 0.9765   | 0.9752 | 0.9784     | 0.9769 | 0.9765   | 0.9725 |
|                               | Cont.  | 0.9608 | 0.9731 | 0.9812 | 0.9797 | 0.9910 | 0.9902 | 0.9915   | 0.9906 | 0.9905     | 0.9895 | 0.9900   | 0.9891 |
|                               | Stead. | 0.8415 | 0.8604 | 0.7570 | 0.7530 | 0.7836 | 0.7981 | 0.8632   | 0.8608 | 0.8643     | 0.8649 | 0.8493   | 0.8538 |
|                               | Cohes. | 0.6496 | 0.6936 | 0.6748 | 0.7019 | 0.7051 | 0.7039 | 0.7680   | 0.7503 | 0.7637     | 0.7591 | 0.7792   | 0.7695 |
| — Pointwise-Full Setting —    |        |        |        |        |        |        |        |          |        |            |        |          |        |
| MNIST                         | Trust. | 0.9661 | 0.9679 | 0.9484 | 0.9467 | 0.8457 | 0.8469 | 0.9218   | 0.9166 | 0.9164     | 0.9138 | 0.9137   | 0.9151 |
|                               | Cont.  | 0.9418 | 0.9410 | 0.9376 | 0.9396 | 0.9546 | 0.9538 | 0.9434   | 0.9422 | 0.9428     | 0.9417 | 0.9409   | 0.9403 |
|                               | Stead. | 0.8083 | 0.8113 | 0.7878 | 0.7763 | 0.6953 | 0.6958 | 0.8024   | 0.8003 | 0.8041     | 0.7996 | 0.8025   | 0.7914 |
|                               | Cohes. | 0.7904 | 0.7998 | 0.7855 | 0.7819 | 0.7912 | 0.7843 | 0.7988   | 0.7982 | 0.8034     | 0.7894 | 0.7931   | 0.7919 |
| fashionMNIST                  | Trust. | 0.9647 | 0.9681 | 0.9441 | 0.9434 | 0.8407 | 0.8375 | 0.9283   | 0.9264 | 0.9255     | 0.9245 | 0.9256   | 0.9196 |
|                               | Cont.  | 0.9430 | 0.9454 | 0.9386 | 0.9373 | 0.9542 | 0.9528 | 0.9464   | 0.9460 | 0.9456     | 0.9440 | 0.9451   | 0.9429 |
|                               | Stead. | 0.8118 | 0.8103 | 0.7797 | 0.7779 | 0.6923 | 0.6931 | 0.8087   | 0.8049 | 0.8085     | 0.8003 | 0.8082   | 0.8150 |
|                               | Cohes. | 0.7570 | 0.7882 | 0.7685 | 0.7670 | 0.7564 | 0.7599 | 0.7876   | 0.7786 | 0.7843     | 0.7788 | 0.7838   | 0.7710 |

(balanced/unbalanced). A subset of 10% of the total data points is designated as anchors. In *Full* settings, all anchors are global, and in *Partial*, anchors are split into global and client-specific local sets. The total number of anchors (global + local) is fixed at  $d_h - 1$ , where  $d_h$  is the original feature dimension. In the embedding stage, we use the completed global distance matrix to generate privacy-preserving embeddings using multiple neighbor embedding methods. For Euclidean geometry, we use the official implementations of t-SNE [53], UMAP [37], and PHATE (via its standard Python library). For CNE, we adopt the implementation from [11], where the parameter  $s$  controls the attraction-repulsion tradeoff:  $s = 0$  mimics t-SNE,  $s = 1$  aligns with UMAP, and intermediate values interpolate between them. CNE operates within a contrastive learning framework using negative sampling. For hyperbolic embeddings, we use the CO-SNE implementation from [22].

**Data Partitioning.** To simulate realistic distributed settings, we evaluate SENSE under both IID and non-IID distributions using Dirichlet-based partitioning. For each class  $c$ , client-wise proportions are drawn from  $q_c \sim \text{Dir}(\alpha)$ , where lower  $\alpha$  yields greater heterogeneity and class imbalance [55, 61]. We set  $\alpha = 0.5$  in all experiments. Three partitioning schemes are used: *IID* (uniform class mix), *non-IID balanced* (varying class distributions, equal client sizes), and *non-IID unbalanced* (both class and size vary).

**Evaluation Metrics.** We assess SENSE using both reconstruction and embedding quality metrics. For fidelity, we compute *Relative Distance Error (DE)* and *F-score (FS)* between the reconstructed distance matrix (NA-NA)  $\hat{G}$  and ground truth  $G_{\text{true}}$ :  $\text{DE} = \frac{\|\hat{G} - G_{\text{true}}\|_F}{\|G_{\text{true}}\|_F}$ , and  $\text{FS} = \frac{2 \text{tp}}{2 \text{tp} + \text{fp} + \text{fn}}$ , where tp, fp, and fn are true, false positive, and false negative neighbors respectively [17]. To evaluate 2D embeddings, we compute *Trustworthiness* and *Continuity* [54], which measure neighborhood agreement between original and embedded spaces. We also report *Steadiness* and *Cohesiveness* [26] to assess global structural reliability: steadiness detects false groupings and cohesiveness quantifies how well true input clusters are preserved.

## 4.2 Result Analysis.

We comprehensively evaluate SENSE across: 1) *Standard image datasets (MNIST, FashionMNIST, CIFAR-10)*: These are evaluated under *Pointwise-Full*, *Multisite-Full*, and *Multisite-Partial* with non-IID unbalanced splits. As shown in Table 1 and in Appendix 8, SENSE closely matches centralized baselines across Cont., Trust., Stead., and Cohes. Notably, the *Partial* configuration performs comparably to *Full*, indicating that accurate reconstruction of the global distance matrix is possible even with partial anchor-NA observations. Table 7 further confirms high F-score and low distance error, validating strong neighborhood preservation under strict privacy constraints. 2) *MedMNIST datasets*: These are evaluated across unbalanced non-IID, balanced non-IID, and IID splits. SENSE consistently matches centralized performance (Tables 2, 10, 9), even under high

Table 2: Performance of centralized (Van.) and SENSE variants under non-IID unbalanced splits.

| Data           | Metric | t-SNE  |        | UMAP   |        | PHATE  |        | CNE(s=0) |         | CNE(s=0.5) |        | CNE(s=1) |        |
|----------------|--------|--------|--------|--------|--------|--------|--------|----------|---------|------------|--------|----------|--------|
|                |        | VAN.   | SENSE  | VAN.   | SENSE  | VAN.   | SENSE  | VAN.     | SENSE   | VAN.       | SENSE  | VAN.     | SENSE  |
| PneumoniaMNIST | Trust. | 0.9723 | 0.9712 | 0.7699 | 0.7673 | 0.8570 | 0.8590 | 0.9027   | 0.9008  | 0.8976     | 0.8952 | 0.8832   | 0.8806 |
|                | Cont.  | 0.9418 | 0.9383 | 0.9140 | 0.9154 | 0.9624 | 0.9608 | 0.9594   | 0.9591  | 0.9590     | 0.9583 | 0.9606   | 0.9599 |
|                | Stead. | 0.7868 | 0.7932 | 0.6258 | 0.6168 | 0.7247 | 0.7204 | 0.7552   | 0.7591  | 0.7496     | 0.7461 | 0.7283   | 0.7341 |
|                | Cohes. | 0.6991 | 0.6591 | 0.6318 | 0.6250 | 0.6953 | 0.6957 | 0.6983   | 0.7085  | 0.7052     | 0.7142 | 0.7015   | 0.7065 |
| BloodMNIST     | Trust. | 0.9633 | 0.9609 | 0.8674 | 0.8632 | 0.8493 | 0.8513 | 0.8841   | 0.8816  | 0.8814     | 0.8795 | 0.8737   | 0.8715 |
|                | Cont.  | 0.9256 | 0.9375 | 0.9411 | 0.9401 | 0.9435 | 0.9428 | 0.9555   | 0.9552  | 0.9558     | 0.9556 | 0.9555   | 0.9552 |
|                | Stead. | 0.7498 | 0.7480 | 0.6889 | 0.6874 | 0.6781 | 0.6851 | 0.7172   | 0.7323  | 0.7186     | 0.7216 | 0.7100   | 0.7132 |
|                | Cohes. | 0.7242 | 0.7178 | 0.7253 | 0.7253 | 0.7456 | 0.7448 | 0.7462   | 0.7440  | 0.7384     | 0.7540 | 0.7533   | 0.7379 |
| BreastMNIST    | Trust. | 0.9379 | 0.9378 | 0.7817 | 0.7998 | 0.8921 | 0.8884 | 0.9133   | 0.9117  | 0.9124     | 0.9113 | 0.9108   | 0.9108 |
|                | Cont.  | 0.9508 | 0.9481 | 0.8140 | 0.8247 | 0.9616 | 0.9563 | 0.9519   | 0.9515  | 0.9516     | 0.9513 | 0.9510   | 0.9509 |
|                | Stead. | 0.8417 | 0.8329 | 0.5605 | 0.5550 | 0.8037 | 0.8149 | 0.8438   | 0.8480  | 0.8491     | 0.8495 | 0.8490   | 0.8398 |
|                | Cohes. | 0.6091 | 0.6137 | 0.4095 | 0.4112 | 0.5668 | 0.5570 | 0.5777   | 0.5695  | 0.5807     | 0.5689 | 0.5675   | 0.5585 |
| DermaMNIST     | Trust. | 0.9757 | 0.9770 | 0.7496 | 0.7466 | 0.8737 | 0.8728 | 0.9130   | 0.9121  | 0.9119     | 0.9116 | 0.9020   | 0.9021 |
|                | Cont.  | 0.9461 | 0.9572 | 0.9127 | 0.9122 | 0.9736 | 0.9730 | 0.9709   | 0.9713  | 0.9706     | 0.9707 | 0.9716   | 0.9715 |
|                | Stead. | 0.7977 | 0.7979 | 0.5945 | 0.5936 | 0.7308 | 0.7319 | 0.7739   | 0.7689  | 0.7682     | 0.7686 | 0.7578   | 0.7553 |
|                | Cohes. | 0.7147 | 0.7111 | 0.5586 | 0.5459 | 0.7127 | 0.7108 | 0.7268   | 0.7321  | 0.7385     | 0.7502 | 0.7438   | 0.7383 |
| RetinaMNIST    | Trust. | 0.9797 | 0.9736 | 0.8793 | 0.8636 | 0.9161 | 0.9050 | 0.9486   | 0.9357  | 0.9475     | 0.9348 | 0.9451   | 0.9336 |
|                | Cont.  | 0.9496 | 0.9669 | 0.9273 | 0.9244 | 0.9738 | 0.9734 | 0.9720   | 0.9714  | 0.9707     | 0.9701 | 0.9678   | 0.9680 |
|                | Stead. | 0.8442 | 0.8498 | 0.6307 | 0.5923 | 0.7559 | 0.7636 | 0.8267   | 0.8176  | 0.8196     | 0.8138 | 0.8158   | 0.8040 |
|                | Cohes. | 0.6734 | 0.7281 | 0.5832 | 0.5828 | 0.6957 | 0.6991 | 0.7100   | 0.7137  | 0.7089     | 0.6982 | 0.6883   | 0.6990 |
| OrganCMNIST    | Trust. | 0.9621 | 0.9387 | 0.8887 | 0.8867 | 0.8850 | 0.8871 | 0.9134   | 0.9041  | 0.9159     | 0.9056 | 0.9019   | 0.8907 |
|                | Cont.  | 0.9207 | 0.9170 | 0.9268 | 0.9247 | 0.9691 | 0.9699 | 0.9733   | 0.9693  | 0.9729     | 0.9685 | 0.9737   | 0.9696 |
|                | Stead. | 0.7011 | 0.7855 | 0.7527 | 0.7718 | 0.7935 | 0.8093 | 0.8666   | 0.8755  | 0.8733     | 0.8722 | 0.8597   | 0.8607 |
|                | Cohes. | 0.4685 | 0.5037 | 0.3322 | 0.3373 | 0.5431 | 0.5444 | 0.4653   | 0.5096  | 0.5681     | 0.5233 | 0.5745   | 0.5375 |
| OrganSMNIST    | Trust. | 0.9552 | 0.9357 | 0.8741 | 0.8625 | 0.8792 | 0.8821 | 0.9114   | 0.9028  | 0.9126     | 0.9040 | 0.8993   | 0.8912 |
|                | Cont.  | 0.9214 | 0.9169 | 0.9246 | 0.9213 | 0.9684 | 0.9700 | 0.9738   | 0.9682  | 0.9731     | 0.9675 | 0.9736   | 0.9683 |
|                | Stead. | 0.6765 | 0.7311 | 0.7222 | 0.7485 | 0.7809 | 0.7995 | 0.8609   | 0.8659  | 0.8664     | 0.8708 | 0.8561   | 0.8582 |
|                | Cohes. | 0.4951 | 0.4814 | 0.3603 | 0.3211 | 0.5198 | 0.5343 | 0.4704   | 0.44009 | 0.5192     | 0.4833 | 0.5155   | 0.5033 |
| german-credit  | Trust. | 0.9745 | 0.9543 | 0.9514 | 0.9294 | 0.8555 | 0.8394 | 0.9337   | 0.9124  | 0.9380     | 0.9072 | 0.9336   | 0.9092 |
|                | Cont.  | 0.9583 | 0.9424 | 0.9604 | 0.9410 | 0.9481 | 0.9255 | 0.9571   | 0.9438  | 0.9576     | 0.9438 | 0.9571   | 0.9440 |
|                | Stead. | 0.8576 | 0.8248 | 0.8313 | 0.7933 | 0.7483 | 0.7061 | 0.8398   | 0.7921  | 0.8479     | 0.7855 | 0.8436   | 0.7906 |
|                | Cohes. | 0.6774 | 0.6755 | 0.6638 | 0.6568 | 0.6893 | 0.6745 | 0.6446   | 0.6551  | 0.6575     | 0.6481 | 0.6513   | 0.6676 |

heterogeneity. Table 6 in Appendix, further shows low DE and high FS, confirming strong structural and similarity preservation.

3) *Hyperbolic datasets (Airport, Amazon, DBLP)*: For these datasets, the results in Table 3 highlight SENSE’s geometry-aware design, achieving high FS and very low DE in non-Euclidean spaces. This confirms its adaptability across geometric regimes. Overall, SENSE effectively ensures:

- *Neighbor preservation*: High continuity and trustworthiness show SENSE keeps similar points close in the embedding, preserving semantics across clients.
- *Similarity recovery*: Despite no raw data access, SENSE accurately approximates pairwise distances evidenced by low DE and high FS.
- *Cluster structure*: Comparable steadiness and cohesiveness confirm that SENSE maintains cluster alignment without fragmentation.

**Visualization.** Figure 2 shows global embeddings learned by SENSE on MNIST in the MULTISITE setting with 25,000 non-anchor samples across 10 clients in an unbalanced non-IID split. Using only 783 anchors ( $d_h - 1$ ), SENSE constructs high-quality embeddings without accessing or sharing raw features. Embeddings from t-SNE, UMAP, PHATE, and CNE cleanly separate semantic groups, preserving local neighborhoods and global cluster topology. By estimating inter-client similarities, SENSE enables meaningful inter-client positive/negative contrastive pairs. This highlights its ability to learn structure-preserving, privacy-compliant embeddings in decentralized, heterogeneous settings. Additional visualizations are in the Appendix.

### 4.3 Ablation Study.

To validate Theorems 3.1, 3.2, and Lemma 1, we perform an ablation study by varying anchor count from  $d_h - \epsilon$  to  $d_h + \epsilon$ . We evaluate SENSE using five normalized metrics, plotted in Figure 3:

- Cosine Similarity* [39] between ground-truth  $X_{NA}^G$  and reconstructed latent embeddings  $\hat{X}_{NA}$ ;
- Distance Error* and (iii) *F-score* (Sec. 4.1); (iv) *Pearson Correlation* ( $\rho$ ) [49] over NA-NA distances; and (v) *Frobenius Norm Error* ( $X_{frob}$ ) [28], capturing reconstruction loss (full definitions in Appendix A.14). Key observations from the study:

- *Effective with few anchors*: Even with anchor count well below  $d_h$  (e.g.,  $d_h - 100$ ), SENSE achieves high F-score, low distance error, and strong cosine similarity, showing robust neighborhood preservation in resource-constrained settings.

Table 3: FS and DE for hyperbolic datasets in POINTWISE setting.

| Dataset | FS     | DE       |
|---------|--------|----------|
| AIRPORT | 0.9992 | 0.000067 |
| AMAZON  | 0.9945 | 0.00052  |
| DBLP    | 0.9929 | 0.00073  |



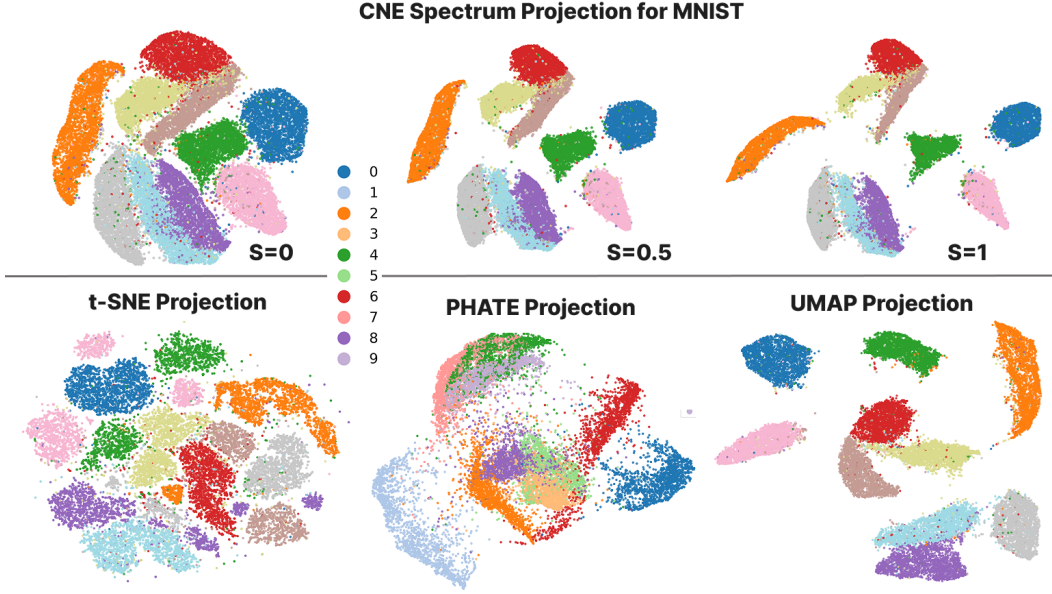

Figure 2: Global embeddings of MNIST under the MULTISITE setting. **Top:** CNE spectrum with SENSE. **Bottom:** t-SNE, PHATE, and UMAP embeddings generated via SENSE without any raw feature sharing. All embeddings preserve global structure while ensuring privacy.

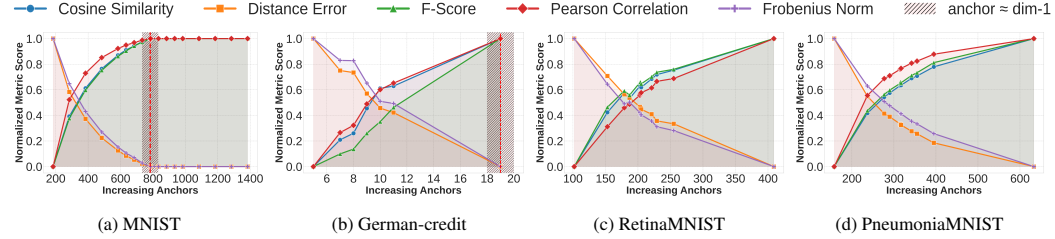

Figure 3: Impact of anchor count on normalized metric scores under non-IID unbalanced distributions. The red vertical line denotes the theoretical privacy threshold at  $d_h - 1$  (783 for MNIST, 19 for German Credit), beyond which exact recovery may be possible. For Retina and Pneumonia, this threshold lies outside the x-axis range, resulting in monotonic performance gains. Trends confirm trade-offs between reconstruction fidelity and privacy risk as anchor count increases.

- *Privacy-compliant reconstruction:* As anchors approach  $d_h$ , cosine and Pearson scores improve. Beyond  $d_h + 1$ , near-zero Frobenius error indicates possible exact recovery highlighting the need to limit anchor count to preserve privacy.
- *Structural consistency:* Pearson correlation rises with anchor count, saturating near 1.0 at  $d_h + 1$ , with corresponding drops in Frobenius error confirming theoretical bounds for exact recovery.
- *Metric alignment with theoretical thresholds:* Across datasets, all metrics converge near  $d_h$ , with diminishing gains beyond matching theoretical thresholds.

These results validate that SENSE achieves high-fidelity, privacy-compliant reconstruction with minimal anchors, making it scalable and effective in decentralized settings with limited observability.

## 5 Conclusion

We propose SENSE, a unified geometry-aware framework for decentralized neighbor embedding that enables global projections without raw data exchange. SENSE addresses the key challenge of missing inter-client similarities via structured matrix completion using anchor-based distance observations. It supports both Euclidean and hyperbolic spaces and adapts to four practical deployment settings. By reconstructing global distance geometry from sparse, client-local views, SENSE accurately approximates both attractive–repulsive (NE) and positive–negative (CNE) interactions, while limiting anchor count to preserve privacy. The completed matrix enables classical and contrastive neighbor embeddings under strong privacy guarantees. Extensive experiments show that SENSE closely matches centralized baselines in neighborhood and cluster preservation across diverse non-IID scenarios. Theoretical results provide conditions for both faithful reconstruction and formal privacy protection, making SENSE a scalable and secure solution for distributed representation learning.

## References

- [1] S. Agnihotry, R. K. Pathak, D. B. Singh, A. Tiwari, and I. Hussain. Protein structure prediction. In *Bioinformatics*, pages 177–188. Elsevier, 2022.
- [2] T. Awosika, R. Shukla, and B. Pranggono. Transparency and privacy: The role of explainable ai and federated learning in financial fraud detection. *IEEE Access*, PP:1–1, 01 2024. doi: 10.1109/ACCESS.2024.3394528.
- [3] T. Awosika, R. M. Shukla, and B. Pranggono. Transparency and privacy: the role of explainable ai and federated learning in financial fraud detection. *IEEE Access*, 2024.
- [4] P. Baran. On distributed communications networks. *IEEE transactions on Communications Systems*, 12(1):1–9, 1964.
- [5] Y. Bengio, J.-f. Paiement, P. Vincent, O. Delalleau, N. Roux, and M. Ouimet. Out-of-sample extensions for lle, isomap, mds, eigenmaps, and spectral clustering. In S. Thrun, L. Saul, and B. Schölkopf, editors, *Advances in Neural Information Processing Systems*, volume 16. MIT Press, 2003. URL [https://proceedings.neurips.cc/paper\\_files/paper/2003/file/cf05968255451bdefe3c5bc64d550517-Paper.pdf](https://proceedings.neurips.cc/paper_files/paper/2003/file/cf05968255451bdefe3c5bc64d550517-Paper.pdf).
- [6] J. N. Böhm, P. Berens, and D. Kobak. Attraction-repulsion spectrum in neighbor embeddings. *Journal of Machine Learning Research*, 23(95):1–32, 2022.
- [7] C. Bycroft, C. Freeman, D. Petkova, G. Band, L. T. Elliott, K. Sharp, A. Motyer, D. Vukcevic, O. Delaneau, J. O’Connell, A. Cortes, S. Welsh, A. Young, M. Effingham, G. McVean, S. Leslie, N. Allen, P. Donnelly, and J. Marchini. The uk biobank resource with deep phenotyping and genomic data. *Nature*, 562(7726):203–209, 2018. doi: 10.1038/s41586-018-0579-z. URL <https://doi.org/10.1038/s41586-018-0579-z>.
- [8] D. Byrd and A. Polychroniadou. Differentially private secure multi-party computation for federated learning in financial applications. In *Proceedings of the first ACM international conference on AI in finance*, pages 1–9, 2020.
- [9] M. Cavallo and Ç. Demiralp. A visual interaction framework for dimensionality reduction based data exploration. In *Proceedings of the 2018 CHI conference on human factors in computing systems*, pages 1–13, 2018.
- [10] S. Damrich and F. A. Hamprecht. On umap’s true loss function. *Advances in Neural Information Processing Systems*, 34:5798–5809, 2021.
- [11] S. Damrich, J. N. Böhm, F. A. Hamprecht, and D. Kobak. From *t*-sne to umap with contrastive learning, 2023. URL <https://arxiv.org/abs/2206.01816>.
- [12] J. De Leeuw. Convergence of the majorization method for multidimensional scaling. *Journal of classification*, 5(2):163–180, 1988.
- [13] J. De Leeuw. Applications of convex analysis to multidimensional scaling. , (.), 2005.
- [14] L. Deng. The mnist database of handwritten digit images for machine learning research. *IEEE Signal Processing Magazine*, 29(6):141–142, 2012.
- [15] C. Di Franco, E. Bini, M. Marinoni, and G. C. Buttazzo. Multidimensional scaling localization with anchors. In *2017 IEEE International Conference on Autonomous Robot Systems and Competitions (ICARSC)*, pages 49–54, , 2017. IEEE, .
- [16] C. Ding, X. He, H. Zha, and H. D. Simon. Adaptive dimension reduction for clustering high dimensional data. In *2002 IEEE International Conference on Data Mining, 2002. Proceedings.*, pages 147–154. IEEE, 2002.
- [17] H. E. Egilmez, E. Pavez, and A. Ortega. Graph learning from data under laplacian and structural constraints. *IEEE Journal of Selected Topics in Signal Processing*, 11(6):825–841, 2017.

- [18] D. Fu, Z. Zhang, and J. Fan. Dense projection for anomaly detection. In *Proceedings of the AAAI Conference on Artificial Intelligence*, volume 38, pages 8398–8408, 2024.
- [19] O.-E. Ganea, G. Bécigneul, and T. Hofmann. Hyperbolic neural networks, 2018. URL <https://arxiv.org/abs/1805.09112>.
- [20] J. Geiping, H. Bauermeister, H. Dröge, and M. Moeller. Inverting gradients-how easy is it to break privacy in federated learning? *Advances in neural information processing systems*, 33: 16937–16947, 2020.
- [21] F. O. Giuste and J. C. Vizcarra. Cifar-10 image classification using feature ensembles, 2020. URL <https://arxiv.org/abs/2002.03846>.
- [22] Y. Guo, H. Guo, and S. Yu. Co-sne: Dimensionality reduction and visualization for hyperbolic data, 2022. URL <https://arxiv.org/abs/2111.15037>.
- [23] A. Hard, K. Rao, R. Mathews, S. Ramaswamy, F. Beaufays, S. Augenstein, H. Eichner, C. Kiddon, and D. Ramage. Federated learning for mobile keyboard prediction, 2019. URL <https://arxiv.org/abs/1811.03604>.
- [24] S. Herath, M. Roughan, and G. Glonek. High performance out-of-sample embedding techniques for multidimensional scaling. *arXiv preprint arXiv:2111.04067*, 2021.
- [25] H. Hofmann. Statlog (German Credit Data). UCI Machine Learning Repository, 1994. DOI: <https://doi.org/10.24432/C5NC77>.
- [26] H. Jeon, H.-K. Ko, J. Jo, Y. Kim, and J. Seo. Measuring and explaining the inter-cluster reliability of multidimensional projections. *IEEE Transactions on Visualization and Computer Graphics*, 28(1):551–561, 2021.
- [27] A. E. W. Johnson, T. J. Pollard, L. Shen, L.-w. H. Lehman, M. Feng, M. Ghassemi, B. Moody, P. Szolovits, L. Anthony Celi, and R. G. Mark. Mimic-iii, a freely accessible critical care database. *Scientific Data*, 3(1):160035, 2016. doi: 10.1038/sdata.2016.35. URL <https://doi.org/10.1038/sdata.2016.35>.
- [28] R. Kannan. The frobenius problem. In *Foundations of Software Technology and Theoretical Computer Science: Ninth Conference, Bangalore, India December 19–21, 1989 Proceedings 9*, pages 242–251. Springer, 1989.
- [29] M. Kataria, S. Kumar, and Jayadeva. Ugc: Universal graph coarsening. In A. Globerson, L. Mackey, D. Belgrave, A. Fan, U. Paquet, J. Tomczak, and C. Zhang, editors, *Advances in Neural Information Processing Systems*, volume 37, pages 63057–63081. Curran Associates, Inc., 2024. URL [https://proceedings.neurips.cc/paper\\_files/paper/2024/file/733209a1f12071a7ec979e8ffaeb1d99-Paper-Conference.pdf](https://proceedings.neurips.cc/paper_files/paper/2024/file/733209a1f12071a7ec979e8ffaeb1d99-Paper-Conference.pdf).
- [30] M. Keller-Ressel and S. Nargang. Strain-minimizing hyperbolic network embeddings with landmarks, 2022. URL <https://arxiv.org/abs/2207.06775>.
- [31] U. A. Khan, S. Kar, and J. M. Moura. Distributed sensor localization in random environments using minimal number of anchor nodes. *IEEE Transactions on Signal Processing*, 57(5): 2000–2016, 2009.
- [32] L. H. Li, P. H. Chen, C.-J. Hsieh, and K.-W. Chang. Efficient contextual representation learning with continuous outputs. *Transactions of the Association for Computational Linguistics*, 7:611–624, 2019. doi: 10.1162/tacl\_a\_00289. URL <https://aclanthology.org/Q19-1039/>.
- [33] Z. Li, X. Wang, H.-Y. Chen, H.-W. Shen, and W.-L. Chao. Fedne: Surrogate-assisted federated neighbor embedding for dimensionality reduction, 2024. URL <https://arxiv.org/abs/2409.11509>.
- [34] W. Y. B. Lim, N. C. Luong, D. T. Hoang, Y. Jiao, Y.-C. Liang, Q. Yang, D. Niyato, and C. Miao. Federated learning in mobile edge networks: A comprehensive survey. *IEEE communications surveys & tutorials*, 22(3):2031–2063, 2020.

- [35] M. Litviňuková, C. Talavera-López, H. Maatz, D. Reichart, C. L. Worth, E. L. Lindberg, M. Kanda, K. Polanski, M. Heinig, M. Lee, E. R. Nadelmann, K. Roberts, L. Tuck, E. S. Fasouli, D. M. DeLaughter, B. McDonough, H. Wakimoto, J. M. Gorham, S. Samari, K. T. Mahbubani, K. Saeb-Parsy, G. Patone, J. J. Boyle, H. Zhang, H. Zhang, A. Viveiros, G. Y. Oudit, O. A. Bayraktar, J. G. Seidman, C. E. Seidman, M. Nosedá, N. Hubner, and S. A. Teichmann. Cells of the adult human heart. *Nature*, 588(7838):466–472, 2020. doi: 10.1038/s41586-020-2797-4. URL <https://doi.org/10.1038/s41586-020-2797-4>.
- [36] N. Malik, R. Gupta, and S. Kumar. Hyperdefender: A robust framework for hyperbolic gnns. *Proceedings of the AAAI Conference on Artificial Intelligence*, 39(18):19396–19404, Apr. 2025. doi: 10.1609/aaai.v39i18.34135. URL <https://ojs.aaai.org/index.php/AAAI/article/view/34135>.
- [37] L. McInnes, J. Healy, and J. Melville. Umap: Uniform manifold approximation and projection for dimension reduction, 2020. URL <https://arxiv.org/abs/1802.03426>.
- [38] K. R. Moon, D. van Dijk, Z. Wang, S. Gigante, D. B. Burkhardt, W. S. Chen, K. Yim, A. van den Elzen, M. J. Hirn, R. R. Coifman, N. B. Ivanova, G. Wolf, and S. Krishnaswamy. Visualizing structure and transitions for biological data exploration. *bioRxiv*, 2019. doi: 10.1101/120378. URL <https://www.biorxiv.org/content/early/2019/04/04/120378>.
- [39] H. V. Nguyen and L. Bai. Cosine similarity metric learning for face verification. In *Asian conference on computer vision*, pages 709–720. Springer, 2010.
- [40] M. Nickel and D. Kiela. Poincaré embeddings for learning hierarchical representations. *Advances in neural information processing systems*, 30, 2017.
- [41] H. S. Oster, S. Crouch, A. Smith, G. Yu, B. Abu Shrkhihe, S. Baruch, A. Kolomansky, J. Ben-Ezra, S. Naor, P. Fenaux, et al. A predictive algorithm using clinical and laboratory parameters may assist in ruling out and in diagnosing mds. *Blood advances*, 5(16):3066–3075, 2021.
- [42] S. Pape and K. Rannenberg. Applying privacy patterns to the internet of things’(iot) architecture. *Mobile Networks and Applications*, 24:925–933, 2019.
- [43] D. Qiao, X. Ma, and J. Fan. Federated t-sne and umap for distributed data visualization, 2024. URL <https://arxiv.org/abs/2412.13495>.
- [44] A. Regev, S. A. Teichmann, E. S. Lander, I. Amit, C. Benoist, E. Birney, B. Bodenmiller, P. Campbell, P. Carninci, M. Clatworthy, H. Clevers, B. Deplancke, I. Dunham, J. Eberwine, R. Eils, W. Enard, A. Farmer, L. Fugger, B. Göttgens, N. Hacohen, M. Haniffa, M. Hemberg, S. Kim, P. Klennerman, A. Kriegstein, E. Lein, S. Linnarsson, E. Lundberg, J. Lundberg, P. Majumder, J. C. Marioni, M. Merad, M. Mhlanga, M. Nawijn, M. Netea, G. Nolan, D. Pe’er, A. Phillipakis, C. P. Ponting, S. Quake, W. Reik, O. Rozenblatt-Rosen, J. Sanes, R. Satija, T. N. Schumacher, A. Shalek, E. Shapiro, P. Sharma, J. W. Shin, O. Stegle, M. Stratton, M. J. T. Stubbington, F. J. Theis, M. Uhlen, A. van Oudenaarden, A. Wagner, F. Watt, J. Weissman, B. Wold, R. Xavier, N. Yosef, and H. C. A. M. Participants. Science forum: The human cell atlas. *eLife*, 6:e27041, dec 2017. ISSN 2050-084X. doi: 10.7554/eLife.27041. URL <https://doi.org/10.7554/eLife.27041>.
- [45] N. Rieke, J. Hancox, W. Li, F. Milletari, H. R. Roth, S. Albarqouni, S. Bakas, M. N. Galtier, B. A. Landman, K. Maier-Hein, et al. The future of digital health with federated learning. *NPJ digital medicine*, 3(1):119, 2020.
- [46] A. V. Sadr, B. A. Bassett, and M. Kunz. A flexible framework for anomaly detection via dimensionality reduction. In *2019 6th International Conference on Soft Computing & Machine Intelligence (ISCMI)*, pages 106–110. IEEE, 2019.
- [47] D. K. Saha, V. Calhoun, S. M. Kwon, A. Sarwate, R. Saha, and S. Plis. Federated, fast, and private visualization of decentralized data. In *Federated Learning and Analytics in Practice: Algorithms, Systems, Applications, and Opportunities*.
- [48] D. K. Saha, V. D. Calhoun, S. R. Panta, and S. M. Plis. See without looking: joint visualization of sensitive multi-site datasets. In *IJCAI*, pages 2672–2678, 2017.

- [49] P. Sedgwick. Pearson’s correlation coefficient. *Bmj*, 345, 2012.
- [50] M. J. Sheller, G. A. Reina, B. Edwards, J. Martin, and S. Bakas. Multi-institutional deep learning modeling without sharing patient data: A feasibility study on brain tumor segmentation. In *Brainlesion: Glioma, Multiple Sclerosis, Stroke and Traumatic Brain Injuries: 4th International Workshop, BrainLes 2018, Held in Conjunction with MICCAI 2018, Granada, Spain, September 16, 2018, Revised Selected Papers, Part I 4*, pages 92–104. Springer, 2019.
- [51] C. O. S. Sorzano, J. Vargas, and A. P. Montano. A survey of dimensionality reduction techniques. *arXiv preprint arXiv:1403.2877*, 2014.
- [52] A. Tasissa and R. Lai. Exact reconstruction of euclidean distance geometry problem using low-rank matrix completion. *IEEE Transactions on Information Theory*, 65(5):3124–3144, 2019. doi: 10.1109/TIT.2018.2881749.
- [53] L. van der Maaten and G. Hinton. Visualizing data using t-sne. *Journal of Machine Learning Research*, 9(86):2579–2605, 2008. URL <http://jmlr.org/papers/v9/vandermaten08a.html>.
- [54] J. Venna and S. Kaski. Local multidimensional scaling with controlled tradeoff between trustworthiness and continuity. In *Proceedings of 5th Workshop on Self-Organizing Maps*, pages 695–702, 2005.
- [55] Y. Wang, Y. Tong, and D. Shi. Federated latent dirichlet allocation: A local differential privacy based framework. In *Proceedings of the AAAI Conference on Artificial Intelligence*, volume 34, pages 6283–6290, 2020.
- [56] Y. Wang, H. Huang, C. Rudin, and Y. Shaposhnik. Understanding how dimension reduction tools work: an empirical approach to deciphering t-sne, umap, trimap, and pacmap for data visualization. *Journal of Machine Learning Research*, 22(201):1–73, 2021.
- [57] J. Xia, T. Chen, L. Zhang, W. Chen, Y. Chen, X. Zhang, C. Xie, and T. Schreck. Smap: A joint dimensionality reduction scheme for secure multi-party visualization. In *2020 IEEE Conference on Visual Analytics Science and Technology (VAST)*, pages 107–118, 2020. doi: 10.1109/VAST50239.2020.00015.
- [58] H. Xiao, K. Rasul, and R. Vollgraf. Fashion-mnist: a novel image dataset for benchmarking machine learning algorithms, 2017. URL <https://arxiv.org/abs/1708.07747>.
- [59] J. Yang and J. Leskovec. Defining and evaluating network communities based on ground-truth, 2012. URL <https://arxiv.org/abs/1205.6233>.
- [60] J. Yang, R. Shi, D. Wei, Z. Liu, L. Zhao, B. Ke, H. Pfister, and B. Ni. Medmnist v2 - a large-scale lightweight benchmark for 2d and 3d biomedical image classification. *Scientific Data*, 10(1), Jan. 2023. ISSN 2052-4463. doi: 10.1038/s41597-022-01721-8. URL <http://dx.doi.org/10.1038/s41597-022-01721-8>.
- [61] Y. Zhao, M. Li, L. Lai, N. Suda, D. Civin, and V. Chandra. Federated learning with non-iid data. 2018. doi: 10.48550/ARXIV.1806.00582. URL <https://arxiv.org/abs/1806.00582>.
- [62] L. Zhu, Z. Liu, and S. Han. Deep leakage from gradients. *Advances in neural information processing systems*, 32, 2019.
- [63] X. Zu and Q. Tao. Spacemap: Visualizing high-dimensional data by space expansion. In *ICML*, pages 27707–27723, 2022.



## 509 A Appendix

### 510 A.1 Neighbor Embedding (NE).

511 **Definition A.1** *t-SNE models  $p_{ij}$  as symmetrized conditional probabilities using Gaussian kernels:*  
 512  $p_{j|i} \propto \exp(-\|x_i - x_j\|^2 / 2\sigma_i^2)$ , with  $p_{ij} = \frac{p_{j|i} + p_{i|j}}{2n}$ . *Low-dimensional similarities are computed*  
 513 *using a heavy-tailed Student-t kernel:  $q_{ij} \propto (1 + \|y_i - y_j\|^2)^{-1}$ . The loss minimizes the KL*  
 514 *divergence:*

$$\mathcal{L}_{tSNE} = \sum_{i \neq j} p_{ij} \log \frac{p_{ij}}{q_{ij}}.$$

515 **Definition A.2** *UMAP defines  $p_{j|i} = \exp(-(\|x_i - x_j\| - \rho_i)/\tau_i)$  using adaptive exponential kernels,*  
 516 *where  $\rho_i$  is the local connectivity threshold. Symmetrized  $p_{ij}$  is computed via fuzzy set union. In the*  
 517 *embedding space,  $q_{ij} = (1 + a\|y_i - y_j\|^2)^{-b}$  with fixed parameters  $(a, b)$ . The loss is a weighted*  
 518 *binary cross-entropy:*

$$\mathcal{L}_{UMAP} = \sum_{i \neq j} \left[ p_{ij} \log \frac{p_{ij}}{q_{ij}} + (1 - p_{ij}) \log \frac{1 - p_{ij}}{1 - q_{ij}} \right].$$

### 519 A.2 Contrastive Neighbor Embedding (CNE).

520 **Definition A.3** *Given a  $k$ NN graph, high-dimensional similarities are binary:  $S_{ij}^{d_h} = 1$  if  $x_j \in$*   
 521  *$k$ NN( $x_i$ ), and 0 otherwise. In the embedding space, similarities are defined using a Cauchy kernel:*  
 522  $S_{ij}^{d_l} = \phi(\mathbf{y}_i, \mathbf{y}_j) = \frac{1}{1 + \|\mathbf{y}_i - \mathbf{y}_j\|^2}$ . *The CNE objective combines attractive and repulsive forces:*

$$\mathcal{L}(\theta) = -\mathbb{E}_{(i,j) \sim p_i} \log \phi(f_\theta(\mathbf{x}_i), f_\theta(\mathbf{x}_j)) - b \mathbb{E}_{(i,j)} \log(1 - \phi(f_\theta(\mathbf{x}_i), f_\theta(\mathbf{x}_j))),$$

523 *where  $p_i$  samples positive pairs and  $b > 0$  balances the repulsion term.*

### 524 A.3 Hyperbolic Models and Distance Calculation.

525 There are several equivalent models of hyperbolic geometry exist, including the Poincaré ball model,  
 526 lorentz model (or hyperboloid model) and the upper half-space model. The mathematical framework  
 527 of the  $d$ -dimensional hyperboloid model of hyperbolic geometry is deined as follows:

528 For  $x, y \in \mathbb{R}^{d+1}$ , the Lorentz product is an indefinite inner product given by,

$$x \circ y := x_1 y_1 - (x_2 y_2 + \dots + x_{d+1} y_{d+1}). \quad (13)$$

529 The real vector space  $\mathbb{R}^{d+1}$  equipped with this inner product is called *Lorentz space*, denoted by  $\mathbb{R}^{1,d}$ .  
 530 It contains the *positive Lorentz space* as a subset:

$$\mathbb{R}_+^{1,d} := \{x \in \mathbb{R}^{1,d} : x_1 > 0\}.$$

531 Within  $\mathbb{R}_+^{1,d}$ , the *single-sheet hyperboloid*  $\mathbb{H}^{d_h}$  is given by

$$\mathbb{H}^{d_h} := \{x \in \mathbb{R}^{1,d} : x \circ x = 1, x_1 > 0\}. \quad (14)$$

532 The hyperboloid model in dimension  $d$  with curvature  $-\kappa$  (for  $\kappa > 0$ ) consists of  $\mathbb{H}^{d_h}$  endowed with  
 533 the hyperbolic distance:

$$d_{\mathbb{H}}^\kappa(x, y) = \frac{1}{\sqrt{\kappa}} \operatorname{arcosh}(x \circ y), \quad x, y \in \mathbb{H}^{d_h}. \quad (15)$$

534 The distance  $d_{\mathbb{H}}^\kappa$  is a valid metric on  $\mathbb{H}^{d_h}$ , it is positive definite and satisfies the triangle inequality.  
 535 Moreover, equipped with the metric tensor:

$$ds^2 = \frac{1}{\kappa} (dx \circ dx),$$

536 the hyperboloid  $\mathbb{H}^{d_h}$  becomes a Riemannian manifold of constant sectional curvature  $-\kappa$ , and  $d_{\mathbb{H}}^\kappa$   
 537 corresponds exactly to its geodesic distance. In particular, the curvature  $\kappa$  does not alter the definition  
 538 of the manifold  $\mathbb{H}^{d_h}$  itself, but only scales the distance metric. Just as Euclidean space is the canonical  
 539 model for zero curvature, hyperbolic space is the canonical geometry for constant negative curvature.

### 540 A.3.1 Poincaré Ball Model.

541 The Poincaré ball model is the most widely used formulation of hyperbolic space in machine  
 542 learning [19, 40]. It defines the  $n$ -dimensional hyperbolic space as  $\mathbb{B}^n = \{x \in \mathbb{R}^n : \|x\| < 1\}$  with  
 543 Riemannian metric  $g_x = \left(\frac{2}{1-\|x\|^2}\right)^2 I_n$ . The hyperbolic distance between two points  $u, v \in \mathbb{B}^n$  is:

$$d_{\mathbb{B}^n}(u, v) = \operatorname{arcosh} \left( 1 + \frac{2\|u - v\|^2}{(1 - \|u\|^2)(1 - \|v\|^2)} \right). \quad (16)$$

544 This distance increases exponentially near the boundary, enabling natural hierarchical embeddings  
 545 where central points correspond to root nodes and peripheral points to leaves.

### 546 A.4 CO-SNE

547 **Definition A.4** *CO-SNE defines the similarities via hyperbolic normal kernels in the high-*  
 548 *dimensional Poincaré ball  $\mathbb{B}^n$ :  $p_{j|i} = \exp(-d_{\mathbb{B}^n}(x_i, x_j)^2 / 2\sigma_i^2) / Z_i$ , with  $p_{ij} = (p_{j|i} + p_{i|j}) / 2m$ .*  
 549 *In the embedding space  $\mathbb{B}^2$ , similarities use a hyperbolic Cauchy kernel:  $q_{ij} = \gamma^2 / (d_{\mathbb{B}^2}(y_i, y_j)^2 +$   
 550  $\gamma^2) / Z$ . The loss combines KL divergence with a norm-based regularizer:*

$$\mathcal{L}_{CO-SNE} = \lambda_1 \sum_{i,j} p_{ij} \log \frac{p_{ij}}{q_{ij}} + \lambda_2 \sum_i (\|x_i\|^2 - \|y_i\|^2)^2. \quad (17)$$

### 551 A.5 Classical MDS

552 Utilizing the measurements of distances among pairs of objects, MDS (multidimensional scaling)  
 553 finds a representation of each object in  $d$ -dimensional space such that the distances are preserved in  
 554 the estimated configuration as closely as possible. To validate the goodness-of-fit measure, MDS  
 555 optimizes the loss function (known as "Stress"( $\sigma$ )) given by:

$$\sigma(X) = \min_X \sum_{i < j \leq N} w_{ij} (\delta_{ij} - d_{ij}(X))^2, \quad (18)$$

556 , where the observation mask is  $W$  where  $w_{ij} = 1$  if the distance  $\delta_{ij}$  is known and  $w_{ij} = 0$  otherwise,  
 557 with the block structure:

$$W = \begin{bmatrix} \mathbf{0}_{N \times N} & \mathbf{1}_{N \times M} \\ \mathbf{1}_{M \times N} & \mathbf{1}_{M \times M} \end{bmatrix} \quad (19)$$

558 where  $\mathbf{0}$  and  $\mathbf{1}$  denote matrices of zeros and ones, respectively and  $X$  represents the computed  
 559 configuration,  $d_{ij}(X) = \|\mathbf{x}_i - \mathbf{x}_j\|$  is the Euclidean distance between nodes  $i$  and  $j$ ,  $\delta_{ij}$  is the  
 560 measured distance computed privately. Placing the weights of unknown inter-user distance to zero,  
 561 the weight matrix  $W$  can be partitioned into block matrices as shown in 19, where  $\mathbf{1}_{N \times M}$  is a matrix  
 562 of ones with shape  $N \times M$ . De Leeuw [13] applied an iterative method called SMACOF (Scaling by  
 563 Majorizing a Convex Function) to estimate the configuration  $X$ . As the objective is a non-convex  
 564 function, SMACOF minimizes the stress using the simple quadratic function  $\tau(X, Z)$  which bounds  
 565  $\sigma(X)$  (the complicated function) from above and meets the surface at the so-called supporting point  
 566  $Z$  as defined below:

$$\sigma(X) \leq \tau(X, Z) = \sum_{i < j} w_{ij} \delta_{ij}^2 + \sum_{i < j} w_{ij} d_{ij}^2(X) - 2 \sum_{i < j} w_{ij} \delta_{ij}^2 \frac{(\mathbf{x}_i - \mathbf{x}_j)^T (\mathbf{z}_i - \mathbf{z}_j)}{\|\mathbf{z}_i - \mathbf{z}_j\|} \quad (20)$$

567 Equation (20) can be written in matrix form as:

$$\tau(X, Z) = C + \operatorname{tr}(X^T V X) - 2 \operatorname{tr}(X^T B(Z) Z). \quad (21)$$

568 The iterative solution which guarantees monotone convergence of stress [12] is given by equation  
 569 (22), where  $Z = X^{(k-1)}$ :

$$X^{(k)} = \min_X \tau(X, Z) = V^\dagger B(X^{(k-1)}) X^{(k-1)} \quad (22)$$

570 This algorithm offers flexibility to embed features in any dimension other than  $d$ , which enables the  
 571 handling of high-dimensional data and also meets privacy constraints. As  $V$  is not of full rank, hence  
 572 the Moore-Penrose pseudoinverse  $V^\dagger$  is used. The elements of the matrix  $B(X)$  and  $V$  are defined

573 in equation (23).

$$b_{ij} = \begin{cases} -\frac{w_{ij}\delta_{ij}}{d_{ij}(\mathbf{X})}, & \text{if } d_{ij}(\mathbf{X}) \neq 0, i \neq j \\ 0, & \text{if } d_{ij}(\mathbf{X}) = 0, i \neq j \\ -\sum_{j=1, j \neq i}^N b_{ij}, & \text{if } i = j \end{cases} \quad (23)$$

$$v_{ij} = \begin{cases} -w_{ij}, & \text{if } i \neq j \\ -\sum_{j=1, j \neq i}^N v_{ij}, & \text{if } i = j \end{cases}$$

#### 574 A.6 SENSE: Pseudocode

---

##### Algorithm 1 SENSE Framework

---

**Require:** Anchors  $\mathbf{X}_A \in \mathbb{R}^{K \times d_h}$ , client datasets  $\{\mathcal{D}_m = \{x_i^m\}_{i=1}^{N_m}\}_{m=1}^M$ , target dim  $d_\ell$ , high/low geometry  $\mathbb{G}_{\text{high}} \in \{\mathbb{R}^{d_h}, \mathbb{H}^{d_h}\}$ ,  $\mathbb{G}_{\text{low}} \in \{\mathbb{R}^{d_\ell}, \mathbb{H}^{d_\ell}\}$

**Ensure:** Global embeddings  $\{\mathbf{Y}^m \in \mathbb{G}_{\text{low}}^{N_m}\}_{m=1}^M$

- 1: Server broadcasts  $\mathbf{X}_A$  to all clients
  - 2: **for** each client  $\mathcal{C}_m$  **do**
  - 3:   Compute distances  $\mathbf{d}_i^m = \mathcal{D}_{\mathbb{G}_{\text{high}}}(x_i^m, \mathbf{X}_A)$  for all  $x_i^m \in \mathcal{D}_m$
  - 4:   Send  $\{\mathbf{d}_i^m\}_{i=1}^{N_m}$  to server
  - 5: **end for**
  - 6: Server builds observed matrix  $\mathbf{D}_\Omega$  using  $E, F$ , (optionally  $G$ )
  - 7: Complete  $\hat{\mathbf{D}}$  via structured matrix completion; extract  $\hat{\mathbf{G}}$
  - 8: Compute similarities  $S^{d_h}$  from  $\hat{\mathbf{G}}$  using kernel  $f$  (see Eqns 6, 7)
  - 9: Learn embedding  $\mathbf{Y}$  in  $\mathbb{G}_{\text{low}}$  using NE, contrastive, or CO-SNE objective
- 

#### 575 A.7 SENSE via Anchored-MDS: Pseudocode

---

##### Algorithm 2 SENSE via Anchored-MDS

---

**Require:** Anchor embeddings  $X_A \in \mathbb{R}^{K \times d_h}$ , observed entries  $\mathcal{P}_\Omega(D)$ , target dim  $d_h$ , tolerance  $\epsilon$ , max iterations  $T$

**Ensure:** Reconstructed embeddings  $X_{NA} \in \mathbb{R}^{N \times d_h}$

- 1: Initialize  $X_{NA}^{(0)}$  randomly, set  $k \leftarrow 1$
  - 2: **while**  $k \leq T$  **do**
  - 3:   Form  $X^{(k-1)} = \begin{bmatrix} X_A & X_{NA}^{(k-1)} \end{bmatrix}^T$
  - 4:   Compute  $\mathcal{P}_\Omega(D(X^{(k-1)}))$
  - 5:   Construct  $W$  and compute  $V, B(X^{(k-1)})$  respecting  $\Omega$
  - 6:   Update  $X_{NA}^{(k)}$  using Eq. (11)
  - 7:   If stress improvement  $< \epsilon$ , **break**; else  $k \leftarrow k + 1$
  - 8: **end while**
  - 9: **return**  $X_{NA}^{(k)}$
- 

#### 576 A.8 Anchor Generation

577 In the proposed method, distribution of the anchor data is critical. The anchor is a common information  
578 shared between all the clients. The anchor data is generated randomly or by open data for securing  
579 privacy. The proper scheduling of the anchors has a significant impact on the overall performance  
580 and accuracy of the framework. There are several factors to consider when developing the anchor  
581 scheduling strategy, including:

582 **Number of anchors:** The number of anchors used in the framework has a direct impact on the  
583 algorithmic performance. Too few anchors may not preserve the structural information while ensuring  
584 privacy, while too many anchors may lead to overfitting and may violate privacy.

585 **Selection criteria:** The criteria used to select anchors can also impact the performance of the system.  
 586 Selecting anchors from the same probability distribution as of the underlying user data may be more  
 587 effective than selecting them at random. For example, the data distribution of patient similarity  
 588 networks or social networks will depend on factors including a number of patients/users or similarity  
 589 of patients/connection between users.

Table 4: Observed index sets  $\Omega$  used for SENSE under each client configuration. Here,  $\mathcal{A}_G$  denotes global anchors,  $\mathcal{A}_L^{(j)}$  are local anchors accessible only to client  $j$ , and  $\mathcal{X}^{(m)}$  are NA indices at client  $m$ . Binary masks  $W_F$  and  $W_G$  indicate anchor-to-NA and intra-client NA-NA visibility. Observed distances are used to construct  $V$ ,  $B(X)$ , and select relevant rows of  $X_A$  for embedding computation.

| SENSE Setting            | Observed Index Set $\Omega$                                                                                                                                                                                                                                                                                                       |
|--------------------------|-----------------------------------------------------------------------------------------------------------------------------------------------------------------------------------------------------------------------------------------------------------------------------------------------------------------------------------|
| <b>Pointwise-Full</b>    | Each client holds one NA. All anchor-to-NA distances are known; no NA-NA or local anchor information.<br>$\Omega = \{(i, j) : i \in \mathcal{A}_G, j \in [K+1, K+N]\} \cup \{(j, i) : i \in \mathcal{A}_G, j \in [K+1, K+N]\}$                                                                                                    |
| <b>Pointwise-Partial</b> | Each client holds one NA. Global anchors $\mathcal{A}_G$ are shared across all clients. Local anchors $\mathcal{A}_L^{(j)}$ are only accessible to client $j$ .<br>$\Omega = \bigcup_{j=1}^N \left( (\mathcal{A}_G \cup \mathcal{A}_L^{(j)}) \times \{K+j\} \cup \{K+j\} \times (\mathcal{A}_G \cup \mathcal{A}_L^{(j)}) \right)$ |
| <b>Multisite-Full</b>    | Each client holds multiple NAs. All anchor-to-NA distances are known. Intra-client NA-NA distances are observed.<br>$\Omega = \{(i, j) : i \in \mathcal{A}_G, j \in [K+1, K+N]\} \cup \{(j, i) : i \in \mathcal{A}_G, j \in [K+1, K+N]\} \cup \bigcup_{m=1}^M (\mathcal{X}^{(m)} \times \mathcal{X}^{(m)})$                       |
| <b>Multisite-Partial</b> | Each client holds multiple NAs. Anchor-to-NA distances are partially known via $W_F$ (global + local anchors). Intra-client NA-NA distances are observed via $W_G$ .<br>$\Omega = \{(i, j+K) : W_F[i, j] = 1\} \cup \{(j+K, i) : W_F[i, j] = 1\} \cup \{(i, j) : W_G[i, j] = 1\}$                                                 |

## 590 A.9 Theoretical Proofs.

591 Unlike some EDG [52] methods that assume uniform random sampling of pairwise distances, SENSE  
 592 uses a structured sampling scheme where anchor-to-NA distances are measured by design. This  
 593 enables deterministic recovery guarantees based on geometric conditions (e.g., connectivity to affinely  
 594 independent anchors), avoiding reliance on probabilistic bounds from random sampling.

595 **Proof A.1** Each NA point  $\mathbf{x}_j \in \mathbb{R}^{d_h}$  computes squared distances to a subset of anchors indexed by  
 596  $\mathcal{I}_j$ , with  $r_j = |\mathcal{I}_j|$ . This yields  $r_j$  quadratic constraints of the form:

$$\|\mathbf{x}_j - \mathbf{a}_i\|^2 = d_{hij}^2, \quad \forall i \in \mathcal{I}_j.$$

597 To analyze identifiability, fix a reference anchor  $\mathbf{a}_k \in \mathcal{I}_G$  from the global anchor set, and consider  
 598 the difference of equations relative to this reference:

$$\|\mathbf{x}_j - \mathbf{a}_i\|^2 - \|\mathbf{x}_j - \mathbf{a}_k\|^2 = d_{hij}^2 - d_{hkj}^2.$$

599 Expanding and simplifying yields the linear system:

$$2(\mathbf{a}_k - \mathbf{a}_i)^\top \mathbf{x}_j = \|\mathbf{a}_k\|^2 - \|\mathbf{a}_i\|^2 + d_{hij}^2 - d_{hkj}^2, \quad \forall i \in \mathcal{I}_j \setminus \{k\}.$$

600 Letting  $A_j \in \mathbb{R}^{(r_j-1) \times d}$  denote the coefficient matrix and  $\mathbf{b}_j$  the RHS vector, we write:

$$A_j \mathbf{x}_j = \mathbf{b}_j.$$

601 This is a system of  $r_j - 1$  linear equations in  $d_h$  unknowns. If  $r_j < d_h + 1$ , then  $\text{rank}(A_j) \leq r_j - 1 <$   
 602  $d_h$ , and the solution set  $\{\mathbf{x}_j \in \mathbb{R}^{d_h} : A_j \mathbf{x}_j = \mathbf{b}_j\}$  forms an affine subspace of dimension at least  
 603  $d_h - r_j + 1$ . Hence, infinitely many solutions exist that satisfy the same anchor distances, preventing  
 604 exact recovery of  $\mathbf{x}_j$ .

605 To ensure privacy across all clients (both pointwise and multisite), we enforce:

$$|\mathcal{I}_j| = K_G + K_L^{(j)} \leq d_h, \quad \forall j \in [N],$$

where  $K_L^{(j)}$  is the number of local anchors accessible to  $\mathbf{x}_j$ . In the multisite case, local anchors are restricted to the corresponding client, and global anchors are common across all clients. This structure ensures that even with partial anchor visibility, each client's feature vector cannot be uniquely recovered from its observed distances.

**Remark 3** Each anchor distance imposes a quadratic constraint on the unknown  $\mathbf{x}_j \in \mathbb{R}^{d_h}$ . If the number of constraints  $r_j$  is less than the ambient dimension  $d$ , the system is underdetermined and has infinitely many solutions. Thus, SENSE preserves privacy by bounding the number of anchor distances accessible to each client.

**Proof A.2** Consider a network in  $d_h$ -dimensional Euclidean space  $\mathbb{R}^{d_h}$ , comprising anchors  $A = \{A_1, A_2, \dots, A_K\}$  and non-anchor nodes  $P = \{P_1, P_2, \dots, P_N\}$ , with feature vectors  $\mathbf{x}_i \in \mathbb{R}^{d_h}$ . Anchors locations are known, while non-anchors need estimation. Previous work [31] shows that in  $\mathbb{R}^{d_h}$ , a minimum of  $(d + 1)$  anchors with known locations is required to locate  $N$  non-anchor nodes. The utilization of anchors for distributed sensor localization constitutes a thoroughly investigated domain, underpinned by the following assumptions:

- (A1) Non-anchor nodes lie inside the convex hull of the anchors, i.e.,  $C(P) \subseteq C(A)$ .
- (A2) Each non-anchor node  $P_i$  has at least one set of neighbor nodes  $N_i \subset (A \cup P)$  with  $|N_i| = d_h + 1$  such that  $i$  lies inside  $C(N_i)$ .
- (A3) In the set  $\{i \cup N_i\}$ , every non-anchor node  $i$  can obtain the inter-node distances among all nodes.

However, to accurately recover features in  $\mathbb{R}^{d_h}$ , at least  $d_h$  anchors are necessary, even if non-anchors are placed in any location. Thus, having fewer than  $d_h$  anchors, i.e.,  $K < d_h$ , guarantees that exact feature embeddings cannot be obtained, ensuring privacy.

**Proof A.3** From Theorem 3.1 (Exact Recovery) in [30], the L-HYDRA algorithm guarantees recovery up to isometry only if  $K \geq d_h$  and the  $K$  anchors are in general position (not lying on a single hyperbolic hyperplane). If  $K < d_h$ , then the system of equations defined by  $E$  and  $F$  is underdetermined: the landmarks do not span  $\mathbb{H}_h^{d_h}$ , and multiple embeddings of the NA points are consistent with the observed distances. Hence, SENSE ensures privacy by choosing  $K < d_h$ , preventing unique reconstruction of private client embeddings.

#### A.10 Metric Used.

- **Cosine Similarity (CosSim):** Measures angular similarity between the original NA feature matrix  $X'_{NA} \in \mathbb{R}^{N \times d_h}$  and the reconstructed version  $X_{NA} \in \mathbb{R}^{N \times d_h}$  from SENSE-anchored MDS. Cosine similarity is computed as:

$$\text{CosSim}(X'_{NA}, X_{NA}) = \frac{1}{N} \sum_{i=1}^N \frac{\langle X'_{NA}^{(i)}, X_{NA}^{(i)} \rangle}{\|X'_{NA}^{(i)}\| \cdot \|X_{NA}^{(i)}\|}$$

High values (close to 1) indicate strong alignment between original and reconstructed embeddings.

- **Distance Error (DE):** and **F-score (FS):** defined in Section 4.1.
- **Pearson Correlation ( $\rho$ ):** Quantifies linear correlation between the original and reconstructed NA-NA distance matrices:

$$\rho = \text{Pearson}(G_{ij}, \hat{G}_{ij}), \quad \forall i < j$$

where  $G$  and  $\hat{G}$  denote the ground-truth and reconstructed distance matrices respectively. Values close to 1 indicate that the relative distance structure is preserved.

- **Frobenius Norm Error ( $X_{frob}$ ):** Measures reconstruction error in the embedding space:

$$X_{frob} = \frac{\|X_{NA} - X'_{NA}\|_F}{\|X'_{NA}\|_F}$$

A value of 0 implies perfect reconstruction; higher values suggest increasing deviation.



## 646 A.11 Dataset Statistics.

Table 5: Dataset statistics and learning setups grouped by embedding geometry. For hyperbolic, the stats are for *Pointwise* setting.

| Space      | Dataset        | #Classes | #Datapoints | #Clients (M) | Dimension |
|------------|----------------|----------|-------------|--------------|-----------|
| Euclidean  | MNIST          | 10       | 25000       | 10           | 784       |
|            | Fashion-MNIST  | 10       | 25000       | 10           | 784       |
|            | CIFAR-10       | 10       | 25000       | 5/10         | 1024      |
|            | DermaMNIST     | 7        | 10015       | 10           | 784       |
|            | PneumoniaMNIST | 2        | 5856        | 10           | 784       |
|            | RetinaMNIST    | 5        | 1600        | 10           | 784       |
|            | BreastMNIST    | 2        | 780         | 10           | 784       |
|            | BloodMNIST     | 8        | 17092       | 10           | 784       |
|            | OrganCMNIST    | 11       | 23583       | 10           | 784       |
|            | OrganSMNIST    | 11       | 25211       | 10           | 784       |
|            | German-Credit  | 2        | 1000        | 10           | 20        |
| Hyperbolic | Airport        | 4        | 3185        | 3185         | 11        |
|            | Amazon         | -        | 5000        | 5000         | 128       |
|            | DBLP           | -        | 5000        | 5000         | 128       |

## 647 A.12 System Specifications

648 All experiments are conducted on a server equipped with two **NVIDIA RTX A6000** GPUs (48 GB  
649 memory each) and an **Intel Xeon Platinum 8360Y** CPU with **1 TB RAM**.

## 650 A.13 Visualization Results

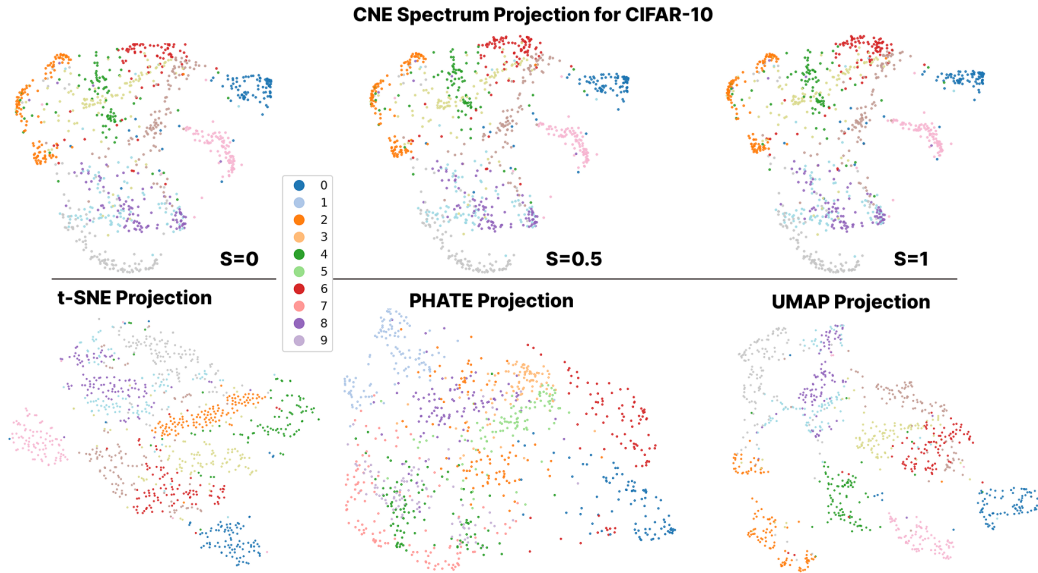

Figure 4: Pointwise setting: CIFAR-10 (1000 non-anchor points, 783 anchors)

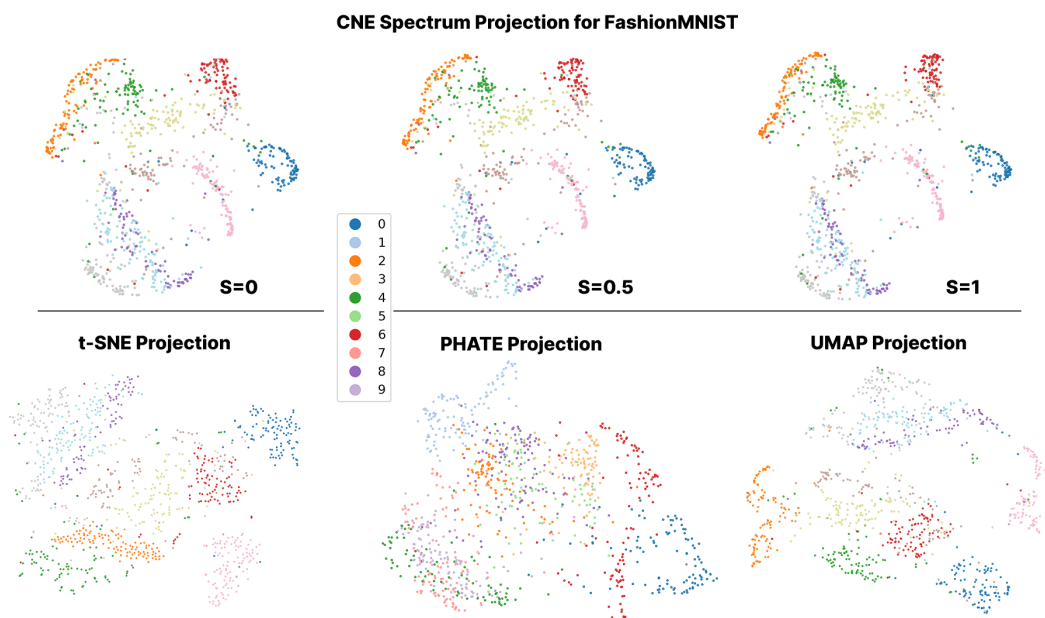

Figure 5: Pointwise setting: FashionMNIST (1000 non-anchor points, 783 anchors)

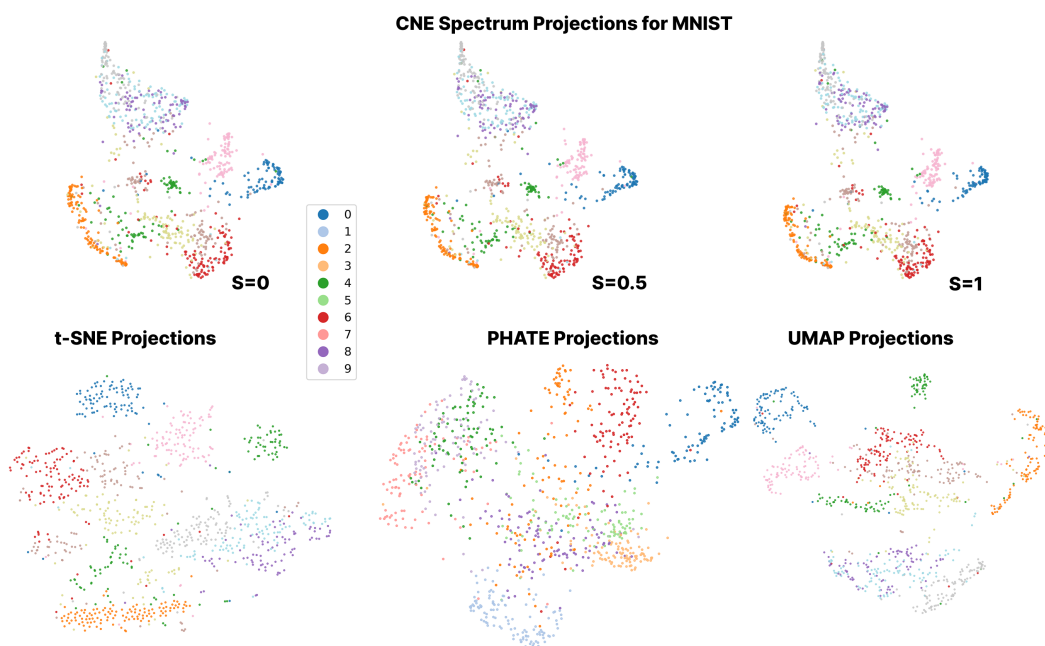

Figure 6: Pointwise setting: MNIST (1000 non-anchor points, 783 anchors)

Table 6: FS and DE across IID, and non-IID balanced and unbalanced splits.

| Data   | IID  |        | Bal  |        | Unbal |        |
|--------|------|--------|------|--------|-------|--------|
|        | FS   | DE     | FS   | DE     | FS    | DE     |
| PNEU.  | 0.92 | 0.0052 | 0.87 | 0.0066 | 0.91  | 0.0055 |
| BLOOD  | 0.90 | 0.0052 | 0.89 | 0.0051 | 0.90  | 0.0052 |
| BREAST | 0.95 | 0.0092 | 0.92 | 0.0113 | 0.91  | 0.0124 |
| DERMA  | 0.96 | 0.0029 | 0.93 | 0.0031 | 0.96  | 0.0029 |
| RETINA | 0.96 | 0.0221 | 0.94 | 0.0272 | 0.96  | 0.0214 |
| ORGANC | 0.80 | 0.0092 | 0.79 | 0.0089 | 0.79  | 0.0092 |
| ORGANS | 0.81 | 0.0089 | 0.80 | 0.0085 | 0.81  | 0.0093 |
| GERMAN | 0.75 | 0.0565 | 0.73 | 0.0621 | 0.72  | 0.0629 |

Table 7: FS and DE under POINTWISE, IID, and NON-IID settings, comparing MULTISITE-FULL and MULTISITE-PARTIAL.

| Dataset      | Pointwise |        | IID-Full |        | IID-Partial |        | Non-IID-Full |        | Non-IID-Partial |        |
|--------------|-----------|--------|----------|--------|-------------|--------|--------------|--------|-----------------|--------|
|              | FS        | DE     | FS       | DE     | FS          | DE     | FS           | DE     | FS              | DE     |
| MNIST        | 0.9557    | 0.0057 | 0.8034   | 0.0097 | 0.9266      | 0.0438 | 0.7864       | 0.0101 | 0.9275          | 0.0434 |
| FashionMNIST | 0.9560    | 0.0058 | 0.7586   | 0.0070 | 0.8726      | 0.0153 | 0.7534       | 0.0070 | 0.8754          | 0.0156 |
| CIFAR-10     | 0.9562    | 0.0057 | 0.9303   | 0.0049 | 0.9277      | 0.0044 | 0.9308       | 0.0049 | 0.9380          | 0.0044 |

Table 8: Multisite setting comparison Non-iid unbalanced: Full vs Partial: Evaluation of different methods (Vanilla and SENSE variants) across different metrics.

| Data                          | Metric | t-SNE  |        | UMAP   |        | PHATE  |        | CNE(s=0) |        | CNE(s=0.5) |        | CNE(s=1) |        |
|-------------------------------|--------|--------|--------|--------|--------|--------|--------|----------|--------|------------|--------|----------|--------|
|                               |        | VAN.   | SENSE  | VAN.   | SENSE  | VAN.   | SENSE  | VAN.     | SENSE  | VAN.       | SENSE  | VAN.     | SENSE  |
| — Multisite-Partial Setting — |        |        |        |        |        |        |        |          |        |            |        |          |        |
| CIFAR-10                      | Trust. | 0.9259 | 0.9274 | 0.7447 | 0.7476 | 0.8175 | 0.8174 | 0.8334   | 0.8336 | 0.8322     | 0.8321 | 0.8232   | 0.8244 |
|                               | Cont.  | 0.9107 | 0.9391 | 0.8756 | 0.8804 | 0.9369 | 0.9381 | 0.9554   | 0.9552 | 0.9552     | 0.9549 | 0.9565   | 0.9561 |
|                               | Stead. | 0.8099 | 0.8165 | 0.6904 | 0.6938 | 0.7363 | 0.7349 | 0.7609   | 0.7654 | 0.7619     | 0.7580 | 0.7415   | 0.7487 |
|                               | Cohes. | 0.4707 | 0.4806 | 0.3725 | 0.3752 | 0.4927 | 0.4857 | 0.4708   | 0.4630 | 0.4716     | 0.4778 | 0.4766   | 0.4793 |
| — Multisite-Full Setting —    |        |        |        |        |        |        |        |          |        |            |        |          |        |
| CIFAR-10                      | Trust. | 0.9259 | 0.9270 | 0.7447 | 0.7482 | 0.8175 | 0.8168 | 0.8334   | 0.8336 | 0.8322     | 0.8329 | 0.8232   | 0.8247 |
|                               | Cont.  | 0.9107 | 0.9364 | 0.8756 | 0.8808 | 0.9369 | 0.9366 | 0.9554   | 0.9553 | 0.9552     | 0.9550 | 0.9565   | 0.9561 |
|                               | Stead. | 0.8099 | 0.8229 | 0.6904 | 0.6875 | 0.7363 | 0.7357 | 0.7609   | 0.7624 | 0.7619     | 0.7580 | 0.7415   | 0.7464 |
|                               | Cohes. | 0.4707 | 0.4673 | 0.3725 | 0.3674 | 0.4927 | 0.4831 | 0.4708   | 0.4662 | 0.4716     | 0.4690 | 0.4766   | 0.4811 |
| — Pointwise-Full Setting —    |        |        |        |        |        |        |        |          |        |            |        |          |        |
| CIFAR-10                      | Trust. | 0.9683 | 0.9659 | 0.9435 | 0.9419 | 0.8488 | 0.8531 | 0.9112   | 0.9123 | 0.9082     | 0.9079 | 0.9021   | 0.9035 |
|                               | Cont.  | 0.9465 | 0.9448 | 0.9379 | 0.9333 | 0.9533 | 0.9527 | 0.9446   | 0.9442 | 0.9458     | 0.9437 | 0.9445   | 0.9442 |
|                               | Stead. | 0.8061 | 0.8081 | 0.7793 | 0.7825 | 0.7111 | 0.7165 | 0.7992   | 0.7878 | 0.7887     | 0.8005 | 0.7808   | 0.7920 |
|                               | Cohes. | 0.7482 | 0.7672 | 0.7415 | 0.7336 | 0.7431 | 0.7365 | 0.7485   | 0.7451 | 0.7513     | 0.7473 | 0.7435   | 0.7350 |

Table 9: IID setting: Evaluation of different dimensionality reduction methods (Vanilla and SENSE variants) across various metrics.

| Data           | Metric | t-SNE  |        | UMAP   |        | PHATE  |        | CNE(s=0) |        | CNE(s=0.5) |        | CNE(s=1) |        |
|----------------|--------|--------|--------|--------|--------|--------|--------|----------|--------|------------|--------|----------|--------|
|                |        | VAN.   | SENSE  | VAN.   | SENSE  | VAN.   | SENSE  | VAN.     | SENSE  | VAN.       | SENSE  | VAN.     | SENSE  |
| PneumoniaMNIST | Trust. | 0.9718 | 0.9700 | 0.7687 | 0.7700 | 0.8573 | 0.8590 | 0.9016   | 0.9026 | 0.8973     | 0.8967 | 0.8837   | 0.8795 |
|                | Cont.  | 0.9395 | 0.9442 | 0.9145 | 0.9143 | 0.9616 | 0.9598 | 0.9592   | 0.9587 | 0.9591     | 0.9582 | 0.9606   | 0.9598 |
|                | Stead. | 0.7840 | 0.7844 | 0.6203 | 0.6272 | 0.7158 | 0.7228 | 0.7554   | 0.7516 | 0.7439     | 0.7424 | 0.7369   | 0.7263 |
|                | Cohes. | 0.7031 | 0.6963 | 0.6081 | 0.6272 | 0.6902 | 0.6898 | 0.7013   | 0.7112 | 0.6981     | 0.6970 | 0.7006   | 0.7050 |
| BloodMNIST     | Trust. | 0.9628 | 0.9611 | 0.8643 | 0.8633 | 0.8515 | 0.8527 | 0.8847   | 0.8820 | 0.8793     | 0.8820 | 0.8729   | 0.8736 |
|                | Cont.  | 0.9312 | 0.9280 | 0.9416 | 0.9391 | 0.9444 | 0.9440 | 0.9555   | 0.9558 | 0.9556     | 0.9558 | 0.9553   | 0.9556 |
|                | Stead. | 0.7515 | 0.7436 | 0.6899 | 0.6764 | 0.6967 | 0.6871 | 0.7259   | 0.7211 | 0.7228     | 0.7211 | 0.7164   | 0.7133 |
|                | Cohes. | 0.7085 | 0.7106 | 0.7233 | 0.7261 | 0.7416 | 0.7469 | 0.7435   | 0.7339 | 0.7329     | 0.7339 | 0.7453   | 0.7462 |
| BreastMNIST    | Trust. | 0.9382 | 0.9370 | 0.7599 | 0.7589 | 0.8835 | 0.8774 | 0.8938   | 0.8924 | 0.8939     | 0.8920 | 0.8934   | 0.8924 |
|                | Cont.  | 0.9452 | 0.9412 | 0.8147 | 0.8174 | 0.9533 | 0.9526 | 0.9450   | 0.9446 | 0.9450     | 0.9445 | 0.9450   | 0.9444 |
|                | Stead. | 0.8522 | 0.8514 | 0.5800 | 0.5697 | 0.8056 | 0.8099 | 0.8400   | 0.8400 | 0.8287     | 0.8308 | 0.8317   | 0.8353 |
|                | Cohes. | 0.6028 | 0.5987 | 0.4226 | 0.4226 | 0.5639 | 0.5611 | 0.5566   | 0.5605 | 0.5637     | 0.5670 | 0.5532   | 0.5606 |
| DermaMNIST     | Trust. | 0.9758 | 0.9762 | 0.7513 | 0.7480 | 0.8726 | 0.8726 | 0.9129   | 0.9118 | 0.9125     | 0.9126 | 0.9017   | 0.9023 |
|                | Cont.  | 0.9592 | 0.9583 | 0.9134 | 0.9129 | 0.9736 | 0.9729 | 0.9709   | 0.9712 | 0.9707     | 0.9706 | 0.9716   | 0.9714 |
|                | Stead. | 0.7995 | 0.7976 | 0.5930 | 0.5945 | 0.7332 | 0.7291 | 0.7726   | 0.7739 | 0.7694     | 0.7638 | 0.7580   | 0.7577 |
|                | Cohes. | 0.7294 | 0.7107 | 0.5590 | 0.5618 | 0.7001 | 0.7184 | 0.7339   | 0.7334 | 0.7390     | 0.7373 | 0.7308   | 0.7297 |
| RetinaMNIST    | Trust. | 0.9797 | 0.9758 | 0.8777 | 0.8643 | 0.9144 | 0.9038 | 0.9480   | 0.9335 | 0.9469     | 0.9331 | 0.9450   | 0.9313 |
|                | Cont.  | 0.9669 | 0.9567 | 0.9280 | 0.9232 | 0.9738 | 0.9730 | 0.9718   | 0.9711 | 0.9704     | 0.9700 | 0.9678   | 0.9678 |
|                | Stead. | 0.8483 | 0.8479 | 0.6120 | 0.5941 | 0.7618 | 0.7434 | 0.8183   | 0.8140 | 0.8117     | 0.8050 | 0.8105   | 0.8086 |
|                | Cohes. | 0.7051 | 0.6963 | 0.5835 | 0.5515 | 0.6980 | 0.6995 | 0.7123   | 0.7074 | 0.7046     | 0.7112 | 0.6831   | 0.7135 |
| OrganCMNIST    | Trust. | 0.9608 | 0.9482 | 0.8879 | 0.8815 | 0.8845 | 0.8858 | 0.9149   | 0.9028 | 0.9160     | 0.9039 | 0.9024   | 0.8890 |
|                | Cont.  | 0.9238 | 0.9413 | 0.9231 | 0.9242 | 0.9696 | 0.9682 | 0.9731   | 0.9683 | 0.9730     | 0.9679 | 0.9738   | 0.9688 |
|                | Stead. | 0.6948 | 0.8027 | 0.7575 | 0.7678 | 0.7994 | 0.8058 | 0.8690   | 0.8677 | 0.8788     | 0.8673 | 0.8624   | 0.8593 |
|                | Cohes. | 0.4762 | 0.4849 | 0.3335 | 0.3145 | 0.5695 | 0.5153 | 0.4751   | 0.4760 | 0.5268     | 0.5001 | 0.5545   | 0.5166 |
| OrganSMNIST    | Trust. | 0.9565 | 0.9421 | 0.8707 | 0.8588 | 0.8766 | 0.8890 | 0.9130   | 0.9026 | 0.9128     | 0.9034 | 0.8991   | 0.8911 |
|                | Cont.  | 0.9219 | 0.9366 | 0.9248 | 0.9211 | 0.9679 | 0.9717 | 0.9741   | 0.9684 | 0.9732     | 0.9672 | 0.9737   | 0.9679 |
|                | Stead. | 0.6793 | 0.7753 | 0.7305 | 0.7513 | 0.7786 | 0.7965 | 0.8609   | 0.8691 | 0.8649     | 0.8745 | 0.8517   | 0.8601 |
|                | Cohes. | 0.4856 | 0.4702 | 0.3327 | 0.3316 | 0.5575 | 0.5094 | 0.4838   | 0.4525 | 0.5312     | 0.4889 | 0.5564   | 0.4783 |
| german-credit  | Trust. | 0.9771 | 0.9553 | 0.9505 | 0.9330 | 0.8559 | 0.8551 | 0.9380   | 0.9224 | 0.9359     | 0.9140 | 0.9325   | 0.9192 |
|                | Cont.  | 0.9590 | 0.9434 | 0.9587 | 0.9449 | 0.9482 | 0.9294 | 0.9573   | 0.9448 | 0.9573     | 0.9429 | 0.9564   | 0.9432 |
|                | Stead. | 0.8603 | 0.8251 | 0.8342 | 0.7907 | 0.7500 | 0.7228 | 0.8414   | 0.7954 | 0.8416     | 0.7883 | 0.8401   | 0.7944 |
|                | Cohes. | 0.6810 | 0.6895 | 0.6542 | 0.6413 | 0.6712 | 0.6640 | 0.6465   | 0.6651 | 0.6577     | 0.6675 | 0.6624   | 0.6550 |

Table 10: Non-IID (balanced) setting: Evaluation of different methods (Vanilla and SENSE variants) across different metrics.

| Data           | Metric | t-SNE  |        | UMAP   |        | PHATE  |        | CNE(s=0) |        | CNE(s=0.5) |        | CNE(s=1) |        |
|----------------|--------|--------|--------|--------|--------|--------|--------|----------|--------|------------|--------|----------|--------|
|                |        | VAN.   | SENSE  | VAN.   | SENSE  | VAN.   | SENSE  | VAN.     | SENSE  | VAN.       | SENSE  | VAN.     | SENSE  |
| PneumoniaMNIST | Trust. | 0.9566 | 0.9483 | 0.8806 | 0.8658 | 0.8909 | 0.8937 | 0.9430   | 0.9393 | 0.9372     | 0.9343 | 0.9226   | 0.9168 |
|                | Cont.  | 0.9228 | 0.9278 | 0.9031 | 0.9114 | 0.9776 | 0.9732 | 0.9683   | 0.9678 | 0.9690     | 0.9686 | 0.9704   | 0.9695 |
|                | Stead. | 0.6952 | 0.7165 | 0.6007 | 0.6211 | 0.7146 | 0.7244 | 0.7778   | 0.7737 | 0.7694     | 0.7692 | 0.7622   | 0.7579 |
|                | Cohes. | 0.6377 | 0.6815 | 0.6205 | 0.6070 | 0.6650 | 0.6771 | 0.7259   | 0.7162 | 0.7240     | 0.7145 | 0.7172   | 0.7336 |
| BloodMNIST     | Trust. | 0.9304 | 0.9292 | 0.8902 | 0.8796 | 0.8640 | 0.8633 | 0.9003   | 0.8972 | 0.8959     | 0.8944 | 0.8862   | 0.8856 |
|                | Cont.  | 0.9020 | 0.9029 | 0.9385 | 0.9390 | 0.9510 | 0.9492 | 0.9618   | 0.9611 | 0.9620     | 0.9614 | 0.9622   | 0.9614 |
|                | Stead. | 0.7060 | 0.7017 | 0.6815 | 0.6927 | 0.6812 | 0.6927 | 0.7531   | 0.7505 | 0.7466     | 0.7442 | 0.7536   | 0.7395 |
|                | Cohes. | 0.6781 | 0.6761 | 0.7210 | 0.7096 | 0.7620 | 0.7540 | 0.7441   | 0.7603 | 0.7472     | 0.7335 | 0.7561   | 0.7603 |
| BreastMNIST    | Trust. | 0.9643 | 0.9657 | 0.8476 | 0.8562 | 0.9188 | 0.9241 | 0.9403   | 0.9422 | 0.9385     | 0.9418 | 0.9383   | 0.9415 |
|                | Cont.  | 0.9632 | 0.9658 | 0.8567 | 0.8408 | 0.9587 | 0.9671 | 0.9604   | 0.9594 | 0.9598     | 0.9590 | 0.9599   | 0.9591 |
|                | Stead. | 0.8331 | 0.8370 | 0.5159 | 0.5081 | 0.7585 | 0.7913 | 0.8712   | 0.8742 | 0.8684     | 0.8616 | 0.8691   | 0.8675 |
|                | Cohes. | 0.6174 | 0.6018 | 0.3677 | 0.3741 | 0.5187 | 0.5165 | 0.5254   | 0.5667 | 0.5265     | 0.5413 | 0.5200   | 0.5485 |
| DermaMNIST     | Trust. | 0.9545 | 0.9467 | 0.8253 | 0.8048 | 0.8963 | 0.8961 | 0.9335   | 0.9351 | 0.9292     | 0.9327 | 0.9147   | 0.9167 |
|                | Cont.  | 0.9403 | 0.9284 | 0.8977 | 0.8895 | 0.9825 | 0.9815 | 0.9742   | 0.9734 | 0.9743     | 0.9733 | 0.9761   | 0.9756 |
|                | Stead. | 0.7304 | 0.7148 | 0.5608 | 0.5428 | 0.7327 | 0.7295 | 0.7901   | 0.7909 | 0.7834     | 0.7841 | 0.7751   | 0.7743 |
|                | Cohes. | 0.6493 | 0.6484 | 0.5159 | 0.5152 | 0.6867 | 0.6726 | 0.6993   | 0.6976 | 0.6976     | 0.7128 | 0.6902   | 0.7012 |
| RetinaMNIST    | Trust. | 0.9749 | 0.9743 | 0.8933 | 0.8829 | 0.9228 | 0.9227 | 0.9522   | 0.9523 | 0.9492     | 0.9519 | 0.9497   | 0.9495 |
|                | Cont.  | 0.9627 | 0.9616 | 0.9289 | 0.9152 | 0.9752 | 0.9729 | 0.9720   | 0.9713 | 0.9712     | 0.9700 | 0.9670   | 0.9675 |
|                | Stead. | 0.8447 | 0.8380 | 0.6155 | 0.6174 | 0.7534 | 0.7559 | 0.8224   | 0.8172 | 0.8134     | 0.8189 | 0.8123   | 0.8046 |
|                | Cohes. | 0.7140 | 0.7283 | 0.5785 | 0.5648 | 0.7189 | 0.6836 | 0.7292   | 0.7005 | 0.7092     | 0.6938 | 0.7039   | 0.6849 |
| OrganCMNIST    | Trust. | 0.9489 | 0.9271 | 0.8975 | 0.8888 | 0.9005 | 0.8984 | 0.9235   | 0.9132 | 0.9232     | 0.9126 | 0.9140   | 0.8994 |
|                | Cont.  | 0.9210 | 0.9082 | 0.9232 | 0.9185 | 0.9737 | 0.9719 | 0.9756   | 0.9715 | 0.9750     | 0.9710 | 0.9760   | 0.9717 |
|                | Stead. | 0.6365 | 0.7142 | 0.7462 | 0.7290 | 0.8038 | 0.7909 | 0.8611   | 0.8724 | 0.8660     | 0.8745 | 0.8621   | 0.8640 |
|                | Cohes. | 0.4862 | 0.4913 | 0.3249 | 0.3191 | 0.5088 | 0.5154 | 0.5338   | 0.4980 | 0.5266     | 0.4974 | 0.4908   | 0.5282 |
| OrganSMNIST    | Trust. | 0.9383 | 0.9093 | 0.8954 | 0.8861 | 0.9054 | 0.9071 | 0.9269   | 0.9190 | 0.9291     | 0.9194 | 0.9172   | 0.9092 |
|                | Cont.  | 0.9164 | 0.8881 | 0.9168 | 0.9255 | 0.9774 | 0.9758 | 0.9796   | 0.9746 | 0.9786     | 0.9741 | 0.9788   | 0.9741 |
|                | Stead. | 0.5896 | 0.6154 | 0.6315 | 0.6953 | 0.7784 | 0.7963 | 0.8591   | 0.8684 | 0.8560     | 0.8634 | 0.8411   | 0.8523 |
|                | Cohes. | 0.5109 | 0.5108 | 0.3441 | 0.3665 | 0.5642 | 0.5278 | 0.5079   | 0.4878 | 0.5461     | 0.5021 | 0.5487   | 0.5001 |
| german-credit  | Trust. | 0.9752 | 0.9575 | 0.9511 | 0.9301 | 0.8552 | 0.8508 | 0.9403   | 0.9211 | 0.9380     | 0.9172 | 0.9350   | 0.9176 |
|                | Cont.  | 0.9581 | 0.9418 | 0.9606 | 0.9427 | 0.9481 | 0.9240 | 0.9576   | 0.9470 | 0.9575     | 0.9463 | 0.9571   | 0.9460 |
|                | Stead. | 0.8567 | 0.8267 | 0.8350 | 0.7850 | 0.7398 | 0.7023 | 0.8484   | 0.8063 | 0.8475     | 0.8016 | 0.8405   | 0.8020 |
|                | Cohes. | 0.6795 | 0.6837 | 0.6488 | 0.6509 | 0.6870 | 0.6828 | 0.6620   | 0.6834 | 0.6557     | 0.6676 | 0.6564   | 0.6653 |

## NeurIPS Paper Checklist

### 1. Claims

Question: Do the main claims made in the abstract and introduction accurately reflect the paper’s contributions and scope?

Answer: [\[Yes\]](#)

Justification: Yes, all the claims are reflected in paper. See Section 4 and Appendix.

Guidelines:

- The answer NA means that the abstract and introduction do not include the claims made in the paper.
- The abstract and/or introduction should clearly state the claims made, including the contributions made in the paper and important assumptions and limitations. A No or NA answer to this question will not be perceived well by the reviewers.
- The claims made should match theoretical and experimental results, and reflect how much the results can be expected to generalize to other settings.
- It is fine to include aspirational goals as motivation as long as it is clear that these goals are not attained by the paper.

### 2. Limitations

Question: Does the paper discuss the limitations of the work performed by the authors?

Answer: [\[Yes\]](#)

Justification: See Section 4. While increasing  $K$  (number of anchors) tends to improve results, it also introduces a trade-off between privacy guarantees and approximation quality. For optimal privacy preservation,  $K$  should be less than  $d_h$ , with  $K = d_h - 1$  being the ideal setting. In 4 we provide the ablation study with varying anchor count to show this. Thus, if we have data such that  $d_h < N$  where  $N$  are the total points, then  $d_h - 1$  anchors are optimal due to manageable computational costs. But for data with  $d_h \gg N$ , using  $K < d_h - 1$  anchors reduces computational costs, although using too few anchors significantly decreases performance, illustrating a trade-off between performance and computational cost.

Guidelines:

- The answer NA means that the paper has no limitation while the answer No means that the paper has limitations, but those are not discussed in the paper.
- The authors are encouraged to create a separate "Limitations" section in their paper.
- The paper should point out any strong assumptions and how robust the results are to violations of these assumptions (e.g., independence assumptions, noiseless settings, model well-specification, asymptotic approximations only holding locally). The authors should reflect on how these assumptions might be violated in practice and what the implications would be.
- The authors should reflect on the scope of the claims made, e.g., if the approach was only tested on a few datasets or with a few runs. In general, empirical results often depend on implicit assumptions, which should be articulated.
- The authors should reflect on the factors that influence the performance of the approach. For example, a facial recognition algorithm may perform poorly when image resolution is low or images are taken in low lighting. Or a speech-to-text system might not be used reliably to provide closed captions for online lectures because it fails to handle technical jargon.
- The authors should discuss the computational efficiency of the proposed algorithms and how they scale with dataset size.
- If applicable, the authors should discuss possible limitations of their approach to address problems of privacy and fairness.
- While the authors might fear that complete honesty about limitations might be used by reviewers as grounds for rejection, a worse outcome might be that reviewers discover limitations that aren’t acknowledged in the paper. The authors should use their best judgment and recognize that individual actions in favor of transparency play an important role in developing norms that preserve the integrity of the community. Reviewers will be specifically instructed to not penalize honesty concerning limitations.

### 3. Theory Assumptions and Proofs

Question: For each theoretical result, does the paper provide the full set of assumptions and a complete (and correct) proof?

Answer: [\[Yes\]](#)

Justification: See Appendix.

Guidelines:



- The answer NA means that the paper does not include theoretical results.
- All the theorems, formulas, and proofs in the paper should be numbered and cross-referenced.
- All assumptions should be clearly stated or referenced in the statement of any theorems.
- The proofs can either appear in the main paper or the supplemental material, but if they appear in the supplemental material, the authors are encouraged to provide a short proof sketch to provide intuition.
- Inversely, any informal proof provided in the core of the paper should be complemented by formal proofs provided in appendix or supplemental material.
- Theorems and Lemmas that the proof relies upon should be properly referenced.

#### 4. **Experimental Result Reproducibility**

Question: Does the paper fully disclose all the information needed to reproduce the main experimental results of the paper to the extent that it affects the main claims and/or conclusions of the paper (regardless of whether the code and data are provided or not)?

Answer: [Yes]

Justification: See Section 4 and Appendix

Guidelines:

- The answer NA means that the paper does not include experiments.
- If the paper includes experiments, a No answer to this question will not be perceived well by the reviewers: Making the paper reproducible is important, regardless of whether the code and data are provided or not.
- If the contribution is a dataset and/or model, the authors should describe the steps taken to make their results reproducible or verifiable.
- Depending on the contribution, reproducibility can be accomplished in various ways. For example, if the contribution is a novel architecture, describing the architecture fully might suffice, or if the contribution is a specific model and empirical evaluation, it may be necessary to either make it possible for others to replicate the model with the same dataset, or provide access to the model. In general, releasing code and data is often one good way to accomplish this, but reproducibility can also be provided via detailed instructions for how to replicate the results, access to a hosted model (e.g., in the case of a large language model), releasing of a model checkpoint, or other means that are appropriate to the research performed.
- While NeurIPS does not require releasing code, the conference does require all submissions to provide some reasonable avenue for reproducibility, which may depend on the nature of the contribution. For example
  - (a) If the contribution is primarily a new algorithm, the paper should make it clear how to reproduce that algorithm.
  - (b) If the contribution is primarily a new model architecture, the paper should describe the architecture clearly and fully.
  - (c) If the contribution is a new model (e.g., a large language model), then there should either be a way to access this model for reproducing the results or a way to reproduce the model (e.g., with an open-source dataset or instructions for how to construct the dataset).
  - (d) We recognize that reproducibility may be tricky in some cases, in which case authors are welcome to describe the particular way they provide for reproducibility. In the case of closed-source models, it may be that access to the model is limited in some way (e.g., to registered users), but it should be possible for other researchers to have some path to reproducing or verifying the results.

#### 5. **Open access to data and code**

Question: Does the paper provide open access to the data and code, with sufficient instructions to faithfully reproduce the main experimental results, as described in supplemental material?

Answer: [Yes]

Justification: All datasets used are publicly available. See Section 4 and link [SENSE-NeurIPS](#)

Guidelines:

- The answer NA means that paper does not include experiments requiring code.
- Please see the NeurIPS code and data submission guidelines (<https://nips.cc/public/guides/CodeSubmissionPolicy>) for more details.
- While we encourage the release of code and data, we understand that this might not be possible, so “No” is an acceptable answer. Papers cannot be rejected simply for not including code, unless this is central to the contribution (e.g., for a new open-source benchmark).

767 • The instructions should contain the exact command and environment needed to run to reproduce  
768 the results. See the NeurIPS code and data submission guidelines ([https://nips.cc/public/  
769 guides/CodeSubmissionPolicy](https://nips.cc/public/guides/CodeSubmissionPolicy)) for more details.  
770 • The authors should provide instructions on data access and preparation, including how to access  
771 the raw data, preprocessed data, intermediate data, and generated data, etc.  
772 • The authors should provide scripts to reproduce all experimental results for the new proposed  
773 method and baselines. If only a subset of experiments are reproducible, they should state which  
774 ones are omitted from the script and why.  
775 • At submission time, to preserve anonymity, the authors should release anonymized versions (if  
776 applicable).  
777 • Providing as much information as possible in supplemental material (appended to the paper) is  
778 recommended, but including URLs to data and code is permitted.

779 **6. Experimental Setting/Details**  
780 Question: Does the paper specify all the training and test details (e.g., data splits, hyperparameters,  
781 how they were chosen, type of optimizer, etc.) necessary to understand the results?  
782 Answer: [Yes]  
783 Justification: See Section 4 and Appendix.  
784 Guidelines:  
785 • The answer NA means that the paper does not include experiments.  
786 • The experimental setting should be presented in the core of the paper to a level of detail that is  
787 necessary to appreciate the results and make sense of them.  
788 • The full details can be provided either with the code, in appendix, or as supplemental material.

789 **7. Experiment Statistical Significance**  
790 Question: Does the paper report error bars suitably and correctly defined or other appropriate  
791 information about the statistical significance of the experiments?  
792 Answer: [Yes]  
793 Justification: See Section 4 and Appendix.  
794 Guidelines:  
795 • The answer NA means that the paper does not include experiments.  
796 • The authors should answer "Yes" if the results are accompanied by error bars, confidence  
797 intervals, or statistical significance tests, at least for the experiments that support the main claims  
798 of the paper.  
799 • The factors of variability that the error bars are capturing should be clearly stated (for example,  
800 train/test split, initialization, random drawing of some parameter, or overall run with given  
801 experimental conditions).  
802 • The method for calculating the error bars should be explained (closed form formula, call to a  
803 library function, bootstrap, etc.)  
804 • The assumptions made should be given (e.g., Normally distributed errors).  
805 • It should be clear whether the error bar is the standard deviation or the standard error of the  
806 mean.  
807 • It is OK to report 1-sigma error bars, but one should state it. The authors should preferably  
808 report a 2-sigma error bar than state that they have a 96% CI, if the hypothesis of Normality of  
809 errors is not verified.  
810 • For asymmetric distributions, the authors should be careful not to show in tables or figures  
811 symmetric error bars that would yield results that are out of range (e.g. negative error rates).  
812 • If error bars are reported in tables or plots, The authors should explain in the text how they were  
813 calculated and reference the corresponding figures or tables in the text.

814 **8. Experiments Compute Resources**  
815 Question: For each experiment, does the paper provide sufficient information on the computer  
816 resources (type of compute workers, memory, time of execution) needed to reproduce the experi-  
817 ments?  
818 Answer: [Yes]  
819 Justification: See Appendix A.12.  
820 Guidelines:  
821 • The answer NA means that the paper does not include experiments.  
822 • The paper should indicate the type of compute workers CPU or GPU, internal cluster, or cloud  
823 provider, including relevant memory and storage.  
824 • The paper should provide the amount of compute required for each of the individual experimental  
825 runs as well as estimate the total compute.

826 • The paper should disclose whether the full research project required more compute than the  
827 experiments reported in the paper (e.g., preliminary or failed experiments that didn't make it  
828 into the paper).

829 **9. Code Of Ethics**

830 Question: Does the research conducted in the paper conform, in every respect, with the NeurIPS  
831 Code of Ethics <https://neurips.cc/public/EthicsGuidelines>?

832 Answer: [Yes]

833 Justification: Research conducted in the paper conform, in every respect, with the NeurIPS Code  
834 of Ethics.

835 Guidelines:

836 • The answer NA means that the authors have not reviewed the NeurIPS Code of Ethics.  
837 • If the authors answer No, they should explain the special circumstances that require a deviation  
838 from the Code of Ethics.  
839 • The authors should make sure to preserve anonymity (e.g., if there is a special consideration due  
840 to laws or regulations in their jurisdiction).

841 **10. Broader Impacts**

842 Question: Does the paper discuss both potential positive societal impacts and negative societal  
843 impacts of the work performed?

844 Answer: [NA]

845 Justification: There is no societal impact of the work performed.

846 Guidelines:

847 • The answer NA means that there is no societal impact of the work performed.  
848 • If the authors answer NA or No, they should explain why their work has no societal impact or  
849 why the paper does not address societal impact.  
850 • Examples of negative societal impacts include potential malicious or unintended uses (e.g.,  
851 disinformation, generating fake profiles, surveillance), fairness considerations (e.g., deploy-  
852 ment of technologies that could make decisions that unfairly impact specific groups), privacy  
853 considerations, and security considerations.  
854 • The conference expects that many papers will be foundational research and not tied to par-  
855 ticular applications, let alone deployments. However, if there is a direct path to any negative  
856 applications, the authors should point it out. For example, it is legitimate to point out that  
857 an improvement in the quality of generative models could be used to generate deepfakes for  
858 disinformation. On the other hand, it is not needed to point out that a generic algorithm for  
859 optimizing neural networks could enable people to train models that generate Deepfakes faster.  
860 • The authors should consider possible harms that could arise when the technology is being used  
861 as intended and functioning correctly, harms that could arise when the technology is being used  
862 as intended but gives incorrect results, and harms following from (intentional or unintentional)  
863 misuse of the technology.  
864 • If there are negative societal impacts, the authors could also discuss possible mitigation strategies  
865 (e.g., gated release of models, providing defenses in addition to attacks, mechanisms for  
866 monitoring misuse, mechanisms to monitor how a system learns from feedback over time,  
867 improving the efficiency and accessibility of ML).

868 **11. Safeguards**

869 Question: Does the paper describe safeguards that have been put in place for responsible release of  
870 data or models that have a high risk for misuse (e.g., pretrained language models, image generators,  
871 or scraped datasets)?

872 Answer: [NA]

873 Justification: The paper poses no such risks

874 Guidelines:

875 • The answer NA means that the paper poses no such risks.  
876 • Released models that have a high risk for misuse or dual-use should be released with necessary  
877 safeguards to allow for controlled use of the model, for example by requiring that users adhere  
878 to usage guidelines or restrictions to access the model or implementing safety filters.  
879 • Datasets that have been scraped from the Internet could pose safety risks. The authors should  
880 describe how they avoided releasing unsafe images.  
881 • We recognize that providing effective safeguards is challenging, and many papers do not require  
882 this, but we encourage authors to take this into account and make a best faith effort.

883 **12. Licenses for existing assets**

884 Question: Are the creators or original owners of assets (e.g., code, data, models), used in the  
885 paper, properly credited and are the license and terms of use explicitly mentioned and properly  
886 respected?  
887 Answer: [Yes]  
888 Justification: Assets are properly credited and publicly available.  
889 Guidelines:  
890 • The answer NA means that the paper does not use existing assets.  
891 • The authors should cite the original paper that produced the code package or dataset.  
892 • The authors should state which version of the asset is used and, if possible, include a URL.  
893 • The name of the license (e.g., CC-BY 4.0) should be included for each asset.  
894 • For scraped data from a particular source (e.g., website), the copyright and terms of service of  
895 that source should be provided.  
896 • If assets are released, the license, copyright information, and terms of use in the package should  
897 be provided. For popular datasets, [paperswithcode.com/datasets](https://paperswithcode.com/datasets) has curated licenses for  
898 some datasets. Their licensing guide can help determine the license of a dataset.  
899 • For existing datasets that are re-packaged, both the original license and the license of the derived  
900 asset (if it has changed) should be provided.  
901 • If this information is not available online, the authors are encouraged to reach out to the asset's  
902 creators.

903 **13. New Assets**  
904 Question: Are new assets introduced in the paper well documented and is the documentation  
905 provided alongside the assets?  
906 Answer: [NA]  
907 Justification: The paper does not release new assets.  
908 Guidelines:  
909 • The answer NA means that the paper does not release new assets.  
910 • Researchers should communicate the details of the dataset/code/model as part of their sub-  
911 missions via structured templates. This includes details about training, license, limitations,  
912 etc.  
913 • The paper should discuss whether and how consent was obtained from people whose asset is  
914 used.  
915 • At submission time, remember to anonymize your assets (if applicable). You can either create  
916 an anonymized URL or include an anonymized zip file.

917 **14. Crowdsourcing and Research with Human Subjects**  
918 Question: For crowdsourcing experiments and research with human subjects, does the paper  
919 include the full text of instructions given to participants and screenshots, if applicable, as well as  
920 details about compensation (if any)?  
921 Answer: [NA]  
922 Justification: The paper does not involve crowdsourcing nor research with human subjects.  
923 Guidelines:  
924 • The answer NA means that the paper does not involve crowdsourcing nor research with human  
925 subjects.  
926 • Including this information in the supplemental material is fine, but if the main contribution of  
927 the paper involves human subjects, then as much detail as possible should be included in the  
928 main paper.  
929 • According to the NeurIPS Code of Ethics, workers involved in data collection, curation, or other  
930 labor should be paid at least the minimum wage in the country of the data collector.

931 **15. Institutional Review Board (IRB) Approvals or Equivalent for Research with Human Sub-  
932 jects**  
933 Question: Does the paper describe potential risks incurred by study participants, whether such  
934 risks were disclosed to the subjects, and whether Institutional Review Board (IRB) approvals  
935 (or an equivalent approval/review based on the requirements of your country or institution) were  
936 obtained?  
937 Answer: [NA]  
938 Justification: The paper does not involve crowdsourcing nor research with human subjects.  
939 Guidelines:  
940 • The answer NA means that the paper does not involve crowdsourcing nor research with human  
941 subjects.

- 942 • Depending on the country in which research is conducted, IRB approval (or equivalent) may be  
943 required for any human subjects research. If you obtained IRB approval, you should clearly  
944 state this in the paper.
- 945 • We recognize that the procedures for this may vary significantly between institutions and  
946 locations, and we expect authors to adhere to the NeurIPS Code of Ethics and the guidelines for  
947 their institution.
- 948 • For initial submissions, do not include any information that would break anonymity (if applica-  
949 ble), such as the institution conducting the review.
